# Supplementary material
Source: publisher figshare collection journal article supplement (https://karger.figshare.com/articles/dataset/_/7694615)
Supplement: Supplementary file 1 [file 1]

Archive with 4 entries (4 files):
- DEE496100.docx
- DEE496100_Supplementary_Material_4_.pdf
- DEE496100_Supplementary_Material_3.pdf
- DEE496100_Supplementary_Material_2.xlsx
