# Supplementary material
Source: publisher figshare collection journal article supplement (https://karger.figshare.com/articles/dataset/_/7694615)
Supplement: Supplementary file 1 [file 1 › DEE496100.docx]

**Supplementary Methods**

**Urine sample collection and laboratory tests**

Spot urine samples were centrifuged at 1,000 g for 15 min and the supernatant was transferred to a new collection tube to remove cell debris and then aliquoted in 1.5 mL tubes for storage at −20 °C until use. General urinalysis (urinary protein, urinary sugar, occult blood) was performed using urine test strips (Pretest 5bII, Wako, Japan for AD samples, and Hema Combistix-long, Siemens Healthcare Japan for control samples). Urinary albumin and creatinine were measured by latex immunological nephelometry using a SPOTCHEM D-01 analyzer (SD-3810, Arkray Global Business, Inc., Japan).

**Protein extraction from urine samples**

Urinary proteins were precipitated using the methanol/chloroform precipitation method from 500 µl urine. First, frozen urine was thawed at 37°C in a water bath for 10 min before precipitation. Next, an equal volume of methanol and 125 µl of chloroform were added to the urine sample and mixed for 5 min. The sample was then centrifuged at 19,000 g at 25°C for 15 min. The supernatant was discarded without disturbing the pellet. An equal volume of methanol was then added to the pellet and mixed gently for 1 min. This sample was centrifuged at 19,000 g at 25 °C for 15 min. Finally, the supernatant was removed and the obtained proteins were dried by air.

For peptide preparation, precipitated proteins were dissolved in 100 µl in 8 M urea and 50 mM Tris-HCl (pH 8.0) buffer. The sample was treated with 1 µl of 1 M dithiothreitol (DTT) and kept at 25°C for 1 h, followed by the immediate addition of 8 µl of iodoacetamide at 25°C for 1 h with shading. The alkylation reaction was stopped with 1 µl of DTT and then diluted eight times with 50 mM Tris-HCl (pH 8.0).

For digestion, 1 µg of trypsin (Agilent, Santa Clara, CA, USA) was added to the sample and incubated at 37°C for 16 h with shaking. The digestion was stopped with 50% trifluoroacetic acid (TFA). The digested sample was purified using a C18 spin column (GL Science, Tokyo, Japan) according to the manufacturer’s instructions. Briefly, a C18 spin column was activated with 100% and 50% acetonitrile sequentially and then equilibrated with 0.2% formic acid and centrifuged at 3,000 *g* for 30 s. After conditioning, the sample was loaded into the spin column and centrifuged at 3,000 *g* for 90 s. Trapped peptides were then washed with 0.2% TFA twice and eluted using 95% acetonitrile with 5% formic acid. The eluted sample was dried with a VEC-260 vacuum dryer (Iwaki, Tokyo, Japan). The sample was re-suspended in 0.1% formic acid and peptide concentration was measured with a NanoDrop 1000 spectrophotometer (Thermo Fisher Scientific, Bremen, Germany). Samples were stored at −80°C until use.

**Mass Spectrometry Analysis**

Samples were analyzed on a Q Exactive Plus spectrometer (Thermo Fisher Scientific, Inc. Bremen, Germany) in the data-dependent acquisition mode. Peptides were resolved with a nanoflow liquid chromatography system (nLC1000, Thermo Fisher Scientific, Inc.) on a trap column (2 cm × 75 µm Acclaim Pepmap 100 column) and a separation column (12.5 cm × 75 µm NTCC-360) at 300 nL/min with a multistep gradient. Mobile phase A: water with 0.1% formic acid; mobile phase B: acetonitrile with 0.1% formic acid. A quantity of 500 ng of peptide was injected and eluted from the analytical column with a linear gradient of 2%B to 35%B over the course of 120 min. Data were obtained in the positive ion mode in scan ranges for MS and MS/MS of 350–1,800 *m/z* and 200–2,000 *m/z*, respectively. The 15 most intense peaks with charge states of 2 and 3 were selected from each survey scan and subjected to CID fragmentation. MS and MS/MS scan parameter settings were as follows: collision energy, 30%; electrospray voltage, 2.0 kV; capillary temperature, 250°C; and isolation window, 4 m/z. All MS and MS/MS spectrums were analyzed by MASCOT (v4.2, Matrix Science) for protein and peptide identification. Data were queried against a Uniprot/Swiss-Prot database (v2015-08; Homo sapiens 20,203 sequences). All database searches were performed using a precursor mass tolerance of ± 10 ppm and fragment ion mass tolerance of ± 0.02 Da. Enzyme specificity was set to trypsin and the maximum missed cleavage value was set to 2. Cysteine carbamidomethylation was set as fixed modification. Identification of proteins and peptides was carried out with a significance threshold of p < 0.05.

**Semi-quantification of proteome data**

The normalized spectral index (SIN), a label-free quantification method [1], was used to compare protein abundances between different samples. Briefly, MASCOT search results were exported in csv format with intensity information of all peptides which related to proteins. Then, all intensity information was extracted and the normalized spectral index (SIN) was calculated for reliable peptides based on pep expect values from the MASCOT search using in-house macro programming software with Microsoft Excel. Finally, SIN values of proteins were compared between AD patients and healthy controls.

**KeyMolnet** **analysis**

KeyMolnet, a commercial knowledge base, has manually curated content on 173,600 molecular relationships among human genes, proteins, and small molecules (contents version 9.7.20171215152618) [2]. It includes core content collected from selected review articles with the highest reliability [3,4]. By importing the list of molecule IDs (UniProtKB IDs) and fold changes in individual proteins, the software automatically provides corresponding molecules as a node on networks. The “interrelation” search provides minimal molecular networks containing as many starting points as possible. The maximum number of paths between the starting points was set to 2. The “start point to end point” search generates a molecular network connecting the starting points to the end points. The path limit between the starting point(s) and the end point(s) was set to 2. In the searches, an algorithm that counts the number of overlapping molecular relations between the extracted network and the canonical pathway allows the identification of the canonical pathway showing the most significant contribution to the extracted network. The significance of the relationship between the extracted network and canonical pathway was scored, and a score >20 was considered statistically significant [3,4].

**References for Supplementary Methods**

1. Griffin NM, Yu J, Long F, Oh P, Shore S, Li Y, et al. Label-free, normalized quantification of complex mass spectrometry data for proteomic analysis. Nat Biotechnol. 2010 Jan;28(1):83-9.

2. Sato H, Ishida S, Toda K, Matsuda R, Hayashi Y, Shigetaka M, et al. New Approaches to Mechanism Analysis for Drug Discovery Using DNA Microarray Data Combined with KeyMolnet. Curr Drug Discov Technol. 2005 Jun;2(2):89-98.

3. Satoh J-I, Asahina N, Kitano S, Kino Y. A Comprehensive Profile of ChIP-Seq-Based Olig2 Target Genes in Motor Neuron Progenitor Cells Suggests the Possible Involvement of Olig2 in the Pathogenesis of Amyotrophic Lateral Sclerosis. J Cent Nerv Syst Dis. 2015 May 18;7:1-14.

4. Fujishima H, Fumoto S, Shibata T, Nishiki K, Tsukamoto Y, Etoh T, et al. A 17-molecule set as a predictor of complete response to neoadjuvant chemotherapy with docetaxel, cisplatin, and 5-fluorouracil in esophageal cancer. PLoS One. 2017 Nov 14;12(11):e0188098.

**Supplementary Table 1.** Clinical information of AD patients.

| Age  (years) | Sex | AD onset  (age) | MMSE score  (points) | Medication  for AD | Diabetes |
| --- | --- | --- | --- | --- | --- |
| 61 | F | 55 | 16 | yes | no |
| 66 | F | 60 | 21 | yes | no |
| 67 | F | 65 | 24 | yes | no |
| 73 | F | 71 | 26 | no | no |
| 73 | F | 66 | 21 | yes | no |
| 73 | F | 72 | 25 | yes | no |
| 73 | F | 71 | 19 | yes | no |
| 77 | F | 76 | 10 | yes | no |
| 79 | F | 70 | 18 | yes | no |
| 79 | F | 76 | 21 | yes | no |
| 65 | M | 64 | 24 | yes | no |
| 66 | M | 59 | 16 | yes | no |
| 75 | M | 70 | 21 | yes | no |
| 76 | M | 72 | 25 | yes | yes |
| 76 | M | 72 | 23 | yes | no |
| 77 | M | 77 | 25 | yes | no |
| 78 | M | 75 | 28 | yes | yes |
| 79 | M | 74 | 25 | yes | yes |

**Supplementary Table 3.** Pathway scores. 18 pathways which scored >20 and were considered significant in the “interrelation” network.

| **Rank** | **Pathway** | **Score** |
| --- | --- | --- |
| 1 | HSP90 signaling pathway | 103.424 |
| 2 | Lipoprotein metabolism | 86.737 |
| 3 | Redox regulation by thioredoxin | 53.188 |
| 4 | MMP signaling pathway | 45.625 |
| 5 | Tetraspanin signaling pathway | 45.319 |
| 6 | 14-3-3 signaling pathway | 38.036 |
| 7 | Angiotensin receptor signaling pathway | 37.427 |
| 8 | PAR signaling pathway | 36.725 |
| 9 | G protein (Gbg) signaling pathway | 34.168 |
| 10 | Ephrin signaling pathway | 31.339 |
| 11 | PDGF signaling pathway | 29.679 |
| 12 | Calcitonin family signaling pathway | 28.893 |
| 13 | Chemokine (CXC) signaling pathway | 25.565 |
| 14 | Estrogen signaling pathway | 23.813 |
| 15 | PI3K signaling pathway | 23.231 |
| 16 | Chemokine (CX3C, XC) signaling pathway | 21.206 |
| 17 | CD44 signaling pathway | 21.177 |
| 18 | FSH signaling pathway | 20.959 |

**Supplementary Table 4.** Pathway scores. 12 pathways which scored >20 and were considered significant in the “AD-related” network.

| **Rank** | **Pathway** | **Score** |
| --- | --- | --- |
| 1 | Lipoprotein metabolism | 90.35 |
| 2 | Transcriptional regulation by CREB | 88.814 |
| 3 | HSP90 signaling pathway | 57.456 |
| 4 | MMP signaling pathway | 47.188 |
| 5 | Redox regulation by thioredoxin | 44.021 |
| 6 | Serotonin signaling pathway | 40.459 |
| 7 | ADAM signaling pathway | 36.853 |
| 8 | Beta-amyloid signaling pathway | 33.478 |
| 9 | Vasopressin signaling pathway | 32.419 |
| 10 | Ephrin signaling pathway | 27.246 |
| 11 | CCK receptor signaling pathway | 20.951 |
| 12 | GDNF family signaling pathway | 20.194 |
