# Supplementary material
Source: publisher figshare collection journal article supplement (https://karger.figshare.com/articles/dataset/_/7694615)
Supplement: Supplementary file 1 [file 1 › DEE496100_Supplementary_Material_2.xlsx]

## Sheet: Suppl.Table 2A, AD
Supplementary Table 2A. Pearson's correlation matrix of proteins selected from Table 2. Analyses of 75 proteins detected in the AD group are shown. Correlation coefficients (γ) are presented in the upper row and p-values in the lower row. Color scheme for γ is gray: 0.0 to ±0.2, black: ±0.2 to ±0.4, blue: ±0.4 to ±0.7, red: ±0.7 to ±1.0. Color scheme for p-values is gray: ≥0.05, black: <0.05 and …
	AZGP1	CFD	GPRC5C	LAIR1	BGN	LAMC1	C7	PSAP	MAN1A1	RDX	GAA	CPVL	HEXB	CNTN1	PGA3	GPI	PRSS8	GALNS	NHLRC3	MIA3	NCAM1	MEGF8	NEO1	PLXDC2	CRIM1	SPOCK2	MMP2	EPHA7	ACAN	C8A	PRG4	CPZ	ATP6AP2	COCH	CYR61	KCNG2	PPT1	MFAP4	CDH16	DDR1	IGFALS	LYPD6B	MUC20	BID	SHMT1	C16orf89	BAMBI	PLD3	GOT1
AZGP1	1	-0.2728	-0.13972	-0.10211	-0.34598	-0.13374	-0.0811	-0.25022	-0.2943	-0.26576	-0.09805	-0.32778	0.01485	-0.31347	0.30221	0.36402	-0.04986	-0.16322	-0.1718	-0.11509	-0.27968	-0.24782	-0.09821	-0.1828	-0.12778	0.44788	-0.35167	-0.21941	-0.04888	-0.22704	-0.19558	-0.1184	-0.20761	-0.11602	-0.12872	-0.1876	-0.15513	-0.33256	-0.35095	-0.17505	-0.27185	-0.18196	-0.26615	0.19977	-0.26224	-0.07555	-0.12035	-0.05794	-0.09965
AZGP1		0.2734	0.5803	0.6868	0.1596	0.5968	0.749	0.3166	0.2358	0.2865	0.6987	0.1842	0.9534	0.2053	0.2229	0.1375	0.8442	0.5175	0.4955	0.6493	0.261	0.3214	0.6983	0.4678	0.6133	0.0623	0.1524	0.3817	0.8473	0.3649	0.4367	0.6398	0.4084	0.6466	0.6107	0.456	0.5388	0.1775	0.1533	0.4872	0.2752	0.4699	0.2857	0.4267	0.2931	0.7657	0.6343	0.8194	0.694
CFD	-0.2728	1	-0.092	-0.26602	0.20745	-0.16462	-0.09211	0.02136	0.31423	0.15975	0.03066	-0.06644	-0.32446	-0.0605	0.13156	-0.18586	-0.09578	-0.08883	-0.23029	0.00177	0.08978	0.18775	-0.03671	0.07497	0.07943	-0.40744	0.51903	0.1081	-0.25233	-0.11907	0.63314	0.05357	0.52919	0.00503	-0.1471	0.08987	0.08218	0.13405	0.02747	0.12652	0.35198	0.00954	0.15014	0.01965	0.03719	0.02163	-0.10438	-0.00097	-0.27859
CFD	0.2734		0.7166	0.286	0.4088	0.5139	0.7162	0.933	0.2041	0.5266	0.9039	0.7934	0.189	0.8115	0.6028	0.4603	0.7054	0.7259	0.3579	0.9944	0.7231	0.4556	0.885	0.7675	0.7541	0.0933	0.0273	0.6694	0.3124	0.6379	0.0048	0.8328	0.0239	0.9842	0.5602	0.7229	0.7458	0.5959	0.9139	0.6169	0.152	0.97	0.5521	0.9383	0.8835	0.9321	0.6802	0.9969	0.263
GPRC5C	-0.13972	-0.092	1	0.7549	0.30605	0.26001	0.57646	0.92219	0.22674	0.73791	0.67911	0.21712	0.18434	0.39222	-0.12777	-0.08874	-0.00881	0.79011	0.61429	0.24168	0.45655	0.28773	0.14632	0.51803	0.38188	0.20998	0.07985	0.41341	0.82534	0.49737	-0.18682	0.20237	0.07265	0.09789	0.04234	0.10926	0.24808	-0.00171	0.17437	0.16985	0.05749	0.27332	0.23863	-0.12107	0.24336	0.5179	0.7438	0.24124	0.6393
GPRC5C	0.5803	0.7166		0.0003	0.2168	0.2974	0.0123	<.0001	0.3656	0.0005	0.0019	0.3868	0.464	0.1074	0.6134	0.7262	0.9723	<.0001	0.0067	0.334	0.0568	0.2469	0.5624	0.0277	0.1179	0.403	0.7528	0.0881	<.0001	0.0357	0.4579	0.4206	0.7745	0.6992	0.8675	0.666	0.3209	0.9946	0.4889	0.5004	0.8208	0.2725	0.3403	0.6323	0.3305	0.0277	0.0004	0.3349	0.0043
LAIR1	-0.10211	-0.26602	0.7549	1	0.48559	0.2219	0.67363	0.75577	0.20431	0.28867	0.63799	0.48238	0.07224	0.60523	0.00887	0.08592	0.15503	0.49528	0.34736	0.3262	0.68013	0.29089	0.13898	0.56537	0.55429	0.46704	0.20163	0.22285	0.72231	0.41991	-0.27691	0.19619	0.05898	0.24219	0.49137	-0.15578	0.1791	-0.21664	0.33882	0.21232	-0.17863	0.66159	0.08786	-0.0365	0.56832	0.42983	0.37752	0.17366	0.73571
LAIR1	0.6868	0.286	0.0003		0.0411	0.3762	0.0022	0.0003	0.4161	0.2453	0.0044	0.0426	0.7758	0.0078	0.9721	0.7346	0.539	0.0366	0.1578	0.1865	0.0019	0.2416	0.5823	0.0145	0.017	0.0507	0.4224	0.3741	0.0007	0.0828	0.266	0.4353	0.8162	0.3329	0.0384	0.5371	0.477	0.3879	0.169	0.3977	0.4782	0.0028	0.7288	0.8857	0.0139	0.075	0.1225	0.4907	0.0005
BGN	-0.34598	0.20745	0.30605	0.48559	1	0.00542	-0.01943	0.45545	0.69494	0.11394	0.44818	0.68765	0.01886	0.78132	0.27579	0.36558	-0.00387	0.36889	0.10108	0.04267	0.53007	0.73288	-0.02753	0.46316	0.35014	0.06507	0.594	0.03653	0.14222	0.33727	0.08746	0.23201	0.45683	0.06621	0.4137	-0.10457	0.44776	0.11494	0.68599	0.64531	0.32826	0.52566	0.35469	0.2309	0.75158	0.3433	0.15832	0.4983	0.60702
BGN	0.1596	0.4088	0.2168	0.0411		0.983	0.939	0.0575	0.0014	0.6526	0.0621	0.0016	0.9408	0.0001	0.268	0.1357	0.9878	0.132	0.6898	0.8665	0.0237	0.0005	0.9136	0.0529	0.1543	0.7975	0.0093	0.8856	0.5735	0.1711	0.73	0.3542	0.0567	0.7941	0.0879	0.6797	0.0624	0.6497	0.0017	0.0038	0.1835	0.0251	0.1487	0.3566	0.0003	0.1631	0.5304	0.0353	0.0076
LAMC1	-0.13374	-0.16462	0.26001	0.2219	0.00542	1	0.34259	0.20517	0.03702	0.4785	0.19398	0.06107	0.58974	0.14232	-0.23694	0.21704	0.82277	0.25533	0.22426	0.20707	-0.01354	0.09757	0.69312	0.09247	0.32087	-0.17937	-0.16778	0.36702	0.35345	0.48843	-0.06075	0.03478	-0.0098	0.01858	-0.10874	0.53393	0.15675	0.19837	-0.05531	0.08649	0.04137	-0.01436	0.24229	-0.12241	0.01568	0.20572	0.20921	0.10479	0.49146
LAMC1	0.5968	0.5139	0.2974	0.3762	0.983		0.164	0.4141	0.884	0.0446	0.4405	0.8098	0.01	0.5732	0.3438	0.387	<.0001	0.3065	0.371	0.4097	0.9575	0.7001	0.0014	0.7151	0.1942	0.4764	0.5058	0.1341	0.1502	0.0397	0.8108	0.891	0.9692	0.9417	0.6676	0.0225	0.5345	0.4301	0.8274	0.7329	0.8705	0.9549	0.3327	0.6285	0.9508	0.4128	0.4048	0.679	0.0383
C7	-0.0811	-0.09211	0.57646	0.67363	-0.01943	0.34259	1	0.56562	-0.1159	0.35568	0.48766	-0.1233	-0.02538	0.04049	0.12598	-0.26198	0.31452	0.29248	0.23664	0.65933	0.24913	-0.08537	0.42979	0.1584	0.54943	-0.0467	-0.10097	0.37412	0.63297	0.18585	-0.05522	0.40509	0.07636	0.57493	0.26264	0.0163	0.04123	-0.17421	-0.09393	-0.09266	-0.2389	0.0903	0.02054	0.07914	-0.08297	0.35032	0.3965	-0.0444	0.3277
C7	0.749	0.7162	0.0123	0.0022	0.939	0.164		0.0144	0.647	0.1475	0.0401	0.6259	0.9204	0.8733	0.6184	0.2936	0.2037	0.2389	0.3444	0.0029	0.3188	0.7363	0.0751	0.5301	0.0182	0.854	0.6902	0.1261	0.0048	0.4603	0.8277	0.0954	0.7633	0.0126	0.2924	0.9488	0.871	0.4893	0.7109	0.7146	0.3397	0.7216	0.9355	0.7549	0.7434	0.1541	0.1033	0.8611	0.1843
PSAP	-0.25022	0.02136	0.92219	0.75577	0.45545	0.20517	0.56562	1	0.33143	0.6216	0.77928	0.25288	0.18692	0.455	-0.07558	-0.17186	-0.00866	0.80809	0.64044	0.23157	0.5807	0.46027	0.25346	0.57505	0.40714	0.15578	0.27738	0.41755	0.76363	0.39998	-0.19574	0.45268	0.25652	0.36238	0.04484	0.00842	0.39892	0.06389	0.26471	0.36526	0.1073	0.32178	0.30854	0.06193	0.28835	0.60009	0.75538	0.35593	0.62834
PSAP	0.3166	0.933	<.0001	0.0003	0.0575	0.4141	0.0144		0.1791	0.0059	0.0001	0.3113	0.4577	0.0578	0.7656	0.4953	0.9728	<.0001	0.0042	0.3552	0.0115	0.0546	0.3102	0.0125	0.0936	0.5371	0.2651	0.0847	0.0002	0.1	0.4363	0.0592	0.3042	0.1395	0.8598	0.9735	0.101	0.8012	0.2884	0.1361	0.6717	0.1929	0.2129	0.8071	0.2459	0.0085	0.0003	0.1472	0.0052
MAN1A1	-0.2943	0.31423	0.22674	0.20431	0.69494	0.03702	-0.1159	0.33143	1	0.27827	0.57726	0.67168	0.00634	0.78067	0.05965	0.07117	0.05539	0.25819	0.15362	0.06967	0.2557	0.90742	-0.07914	0.1927	0.6128	-0.13582	0.47176	0.01237	-0.07635	-0.09816	0.02616	-0.05693	0.76183	-0.0557	0.06548	-0.05804	0.70975	0.45428	0.56894	0.88496	0.57093	0.22008	0.4733	0.21971	0.63066	0.5822	-0.02265	0.77695	0.39126
MAN1A1	0.2358	0.2041	0.3656	0.4161	0.0014	0.884	0.647	0.1791		0.2635	0.0121	0.0023	0.9801	0.0001	0.8141	0.779	0.8272	0.3009	0.5428	0.7835	0.3058	<.0001	0.7549	0.4436	0.0069	0.591	0.0481	0.9611	0.7633	0.6984	0.9179	0.8225	0.0002	0.8263	0.7963	0.819	0.001	0.0582	0.0137	<.0001	0.0133	0.3802	0.0473	0.381	0.005	0.0112	0.9289	0.0001	0.1084
RDX	-0.26576	0.15975	0.73791	0.28867	0.11394	0.4785	0.35568	0.6216	0.27827	1	0.41883	0.09503	0.36365	0.20378	-0.11639	-0.04133	0.23624	0.60478	0.42303	0.26066	0.03768	0.26123	0.13668	0.3244	0.30878	-0.21388	0.12555	0.46883	0.45181	0.42162	0.03668	-0.01461	0.20278	-0.09909	-0.27503	0.45378	0.2752	0.34857	0.14466	0.12799	0.31639	-0.0671	0.36647	-0.12682	0.02412	0.38704	0.55281	0.22008	0.39117
RDX	0.2865	0.5266	0.0005	0.2453	0.6526	0.0446	0.1475	0.0059	0.2635		0.0836	0.7076	0.138	0.4173	0.6456	0.8706	0.3453	0.0078	0.0803	0.2962	0.882	0.2951	0.5886	0.1891	0.2125	0.3941	0.6196	0.0497	0.0598	0.0814	0.8851	0.9541	0.4197	0.6957	0.2694	0.0586	0.269	0.1563	0.5668	0.6128	0.2008	0.7914	0.1347	0.616	0.9243	0.1126	0.0173	0.3802	0.1085
GAA	-0.09805	0.03066	0.67911	0.63799	0.44818	0.19398	0.48766	0.77928	0.57726	0.41883	1	0.34701	0.25358	0.54486	0.09046	-0.18517	0.14775	0.74796	0.64442	0.39575	0.34907	0.66691	0.20464	0.39072	0.7259	0.03416	0.1465	0.26655	0.56623	0.04656	-0.26705	0.26002	0.6417	0.29872	0.01045	-0.27556	0.68884	0.01718	0.16137	0.6629	0.0804	0.16837	0.1227	0.21003	0.35296	0.89885	0.43171	0.71606	0.55935
GAA	0.6987	0.9039	0.0019	0.0044	0.0621	0.4405	0.0401	0.0001	0.0121	0.0836		0.1583	0.31	0.0194	0.7211	0.462	0.5585	0.0004	0.0039	0.104	0.1557	0.0025	0.4153	0.1089	0.0006	0.893	0.5619	0.285	0.0143	0.8545	0.284	0.2974	0.0041	0.2286	0.9672	0.2684	0.0016	0.946	0.5224	0.0027	0.7511	0.5042	0.6277	0.4029	0.1508	<.0001	0.0736	0.0008	0.0158
CPVL	-0.32778	-0.06644	0.21712	0.48238	0.68765	0.06107	-0.1233	0.25288	0.67168	0.09503	0.34701	1	0.14015	0.91584	-0.08018	0.27382	0.08615	0.12947	0.08992	-0.07491	0.58203	0.60685	-0.2499	0.39866	0.41033	0.25614	0.49096	-0.06242	0.00752	0.24776	-0.21133	-0.33554	0.28732	-0.25061	0.29661	-0.11463	0.35193	0.33113	0.7158	0.5448	0.1753	0.68091	0.27975	-0.04977	0.94367	0.21862	-0.19262	0.41021	0.51417
CPVL	0.1842	0.7934	0.3868	0.0426	0.0016	0.8098	0.6259	0.3113	0.0023	0.7076	0.1583		0.5791	<.0001	0.7518	0.2715	0.7339	0.6086	0.7227	0.7677	0.0113	0.0076	0.3173	0.1013	0.0908	0.3049	0.0386	0.8056	0.9764	0.3216	0.3999	0.1734	0.2476	0.3158	0.232	0.6506	0.1521	0.1795	0.0008	0.0194	0.4866	0.0019	0.2609	0.8445	<.0001	0.3834	0.4438	0.0909	0.029
HEXB	0.01485	-0.32446	0.18434	0.07224	0.01886	0.58974	-0.02538	0.18692	0.00634	0.36365	0.25358	0.14015	1	0.06988	-0.16579	0.39135	0.58227	0.44485	0.32943	-0.07114	-0.02825	0.15365	0.31683	0.03796	0.08793	-0.0866	-0.13931	-0.07934	0.10105	0.21361	-0.5265	-0.04373	-0.05256	-0.06615	-0.31671	0.164	0.13847	0.11937	-0.07053	0.10524	-0.11708	-0.14053	-0.05553	-0.07611	0.01141	0.16236	0.17524	0.18323	0.43319
HEXB	0.9534	0.189	0.464	0.7758	0.9408	0.01	0.9204	0.4577	0.9801	0.138	0.31	0.5791		0.7829	0.5109	0.1083	0.0112	0.0643	0.1819	0.7791	0.9114	0.5427	0.2002	0.8811	0.7286	0.7326	0.5814	0.7543	0.6899	0.3947	0.0248	0.8632	0.8359	0.7942	0.2004	0.5155	0.5837	0.6371	0.7809	0.6777	0.6436	0.5781	0.8268	0.7641	0.9641	0.5198	0.4867	0.4668	0.0725
CNTN1	-0.31347	-0.0605	0.39222	0.60523	0.78132	0.14232	0.04049	0.455	0.78067	0.20378	0.54486	0.91584	0.06988	1	-0.04391	0.20566	0.06369	0.29918	0.23609	0.01341	0.57865	0.78376	-0.04243	0.45716	0.52687	0.24493	0.46353	0.10458	0.22898	0.26119	-0.17668	-0.08682	0.4207	-0.06644	0.30401	-0.09616	0.55019	0.28026	0.67753	0.72996	0.3007	0.6405	0.37579	0.05585	0.90917	0.4595	0.04642	0.58041	0.61166
CNTN1	0.2053	0.8115	0.1074	0.0078	0.0001	0.5732	0.8733	0.0578	0.0001	0.4173	0.0194	<.0001	0.7829		0.8627	0.4129	0.8018	0.2278	0.3456	0.9579	0.0119	0.0001	0.8673	0.0565	0.0247	0.3273	0.0527	0.6796	0.3607	0.2951	0.4831	0.7319	0.0821	0.7934	0.22	0.7043	0.018	0.26	0.002	0.0006	0.2253	0.0042	0.1243	0.8258	<.0001	0.0551	0.8549	0.0116	0.007
PGA3	0.30221	0.13156	-0.12777	0.00887	0.27579	-0.23694	0.12598	-0.07558	0.05965	-0.11639	0.09046	-0.08018	-0.16579	-0.04391	1	0.20263	-0.09151	-0.00753	-0.10217	0.46323	-0.2771	0.09746	-0.19747	0.15174	0.11815	-0.1454	0.01641	0.10173	-0.10952	-0.02176	0.23015	0.20167	0.34884	0.16563	0.18772	-0.32045	0.28855	-0.03449	0.21933	0.10012	0.03969	-0.19855	-0.16668	0.57062	-0.07763	0.1926	-0.08956	0.28801	-0.10958
PGA3	0.2229	0.6028	0.6134	0.9721	0.268	0.3438	0.6184	0.7656	0.8141	0.6456	0.7211	0.7518	0.5109	0.8627		0.42	0.718	0.9763	0.6866	0.0529	0.2656	0.7004	0.4322	0.5478	0.6405	0.5648	0.9485	0.6879	0.6653	0.9317	0.3582	0.4223	0.156	0.5113	0.4557	0.1948	0.2455	0.8919	0.3819	0.6926	0.8758	0.4296	0.5086	0.0134	0.7595	0.4439	0.7238	0.2465	0.6651
GPI	0.36402	-0.18586	-0.08874	0.08592	0.36558	0.21704	-0.26198	-0.17186	0.07117	-0.04133	-0.18517	0.27382	0.39135	0.20566	0.20263	1	0.33233	-0.09559	-0.43336	-0.29648	0.0731	0.10917	-0.02463	0.00263	-0.02613	0.25174	0.09896	-0.44875	-0.19239	0.2238	-0.16143	-0.17189	-0.21281	-0.31164	0.19522	0.09306	-0.18447	-0.16857	0.16819	0.01347	-0.07377	0.23011	0.00249	-0.04322	0.3329	-0.27476	-0.14711	-0.07498	0.47614
GPI	0.1375	0.4603	0.7262	0.7346	0.1357	0.387	0.2936	0.4953	0.779	0.8706	0.462	0.2715	0.1083	0.4129	0.42		0.1778	0.7059	0.0724	0.2322	0.7732	0.6663	0.9227	0.9917	0.918	0.3136	0.696	0.0618	0.4444	0.372	0.5222	0.4952	0.3965	0.2081	0.4376	0.7134	0.4637	0.5037	0.5047	0.9577	0.7711	0.3583	0.9922	0.8648	0.1771	0.2698	0.5602	0.7675	0.0458
PRSS8	-0.04986	-0.09578	-0.00881	0.15503	-0.00387	0.82277	0.31452	-0.00866	0.05539	0.23624	0.14775	0.08615	0.58227	0.06369	-0.09151	0.33233	1	0.016	-0.1128	0.34493	-0.06629	0.06413	0.47798	-0.10801	0.50614	-0.20939	-0.00571	0.05421	-0.02309	0.1301	-0.1847	-0.0862	0.11623	0.07708	0.10511	0.37933	0.05363	0.07659	0.01348	0.07822	-0.02952	-0.0013	0.1432	0.05134	0.05971	0.11493	-0.18273	0.05836	0.43035
PRSS8	0.8442	0.7054	0.9723	0.539	0.9878	<.0001	0.2037	0.9728	0.8272	0.3453	0.5585	0.7339	0.0112	0.8018	0.718	0.1778		0.9498	0.6559	0.161	0.7938	0.8004	0.0448	0.6697	0.0321	0.4043	0.9821	0.8308	0.9275	0.6069	0.4631	0.7338	0.646	0.7611	0.6781	0.1205	0.8326	0.7626	0.9577	0.7577	0.9074	0.9959	0.5708	0.8397	0.8139	0.6498	0.468	0.8181	0.0746
GALNS	-0.16322	-0.08883	0.79011	0.49528	0.36889	0.25533	0.29248	0.80809	0.25819	0.60478	0.74796	0.12947	0.44485	0.29918	-0.00753	-0.09559	0.016	1	0.83613	0.25644	0.1794	0.40073	0.1563	0.44828	0.24774	0.03456	0.01839	0.42742	0.70158	0.42836	-0.18926	0.27738	0.25515	0.0655	-0.08484	0.02926	0.44673	-0.04385	0.10642	0.34188	0.12881	0.01431	0.12178	0.08556	0.11836	0.67419	0.71049	0.50139	0.5442
GALNS	0.5175	0.7259	<.0001	0.0366	0.132	0.3065	0.2389	<.0001	0.3009	0.0078	0.0004	0.6086	0.0643	0.2278	0.9763	0.7059	0.9498		<.0001	0.3043	0.4763	0.0994	0.5357	0.0621	0.3216	0.8917	0.9422	0.0769	0.0012	0.0761	0.452	0.2651	0.3069	0.7962	0.7378	0.9083	0.0631	0.8628	0.6743	0.165	0.6105	0.9551	0.6302	0.7357	0.6399	0.0022	0.001	0.034	0.0196
NHLRC3	-0.1718	-0.23029	0.61429	0.34736	0.10108	0.22426	0.23664	0.64044	0.15362	0.42303	0.64442	0.08992	0.32943	0.23609	-0.10217	-0.43336	-0.1128	0.83613	1	0.24229	0.07626	0.28491	0.20646	0.39336	0.13247	0.03689	-0.22848	0.57701	0.67348	0.33803	-0.22383	0.20507	0.17753	0.08098	-0.20202	-0.02601	0.52014	0.14001	0.04937	0.29698	0.14247	-0.10045	0.02935	0.07699	-0.00446	0.67352	0.57201	0.53025	0.22754
NHLRC3	0.4955	0.3579	0.0067	0.1578	0.6898	0.371	0.3444	0.0042	0.5428	0.0803	0.0039	0.7227	0.1819	0.3456	0.6866	0.0724	0.6559	<.0001		0.3327	0.7636	0.2518	0.4111	0.1063	0.6003	0.8844	0.3618	0.0122	0.0022	0.1701	0.3719	0.4143	0.481	0.7494	0.4214	0.9184	0.0269	0.5795	0.8457	0.2314	0.5728	0.6917	0.908	0.7614	0.986	0.0022	0.0131	0.0236	0.3638
MIA3	-0.11509	0.00177	0.24168	0.3262	0.04267	0.20707	0.65933	0.23157	0.06967	0.26066	0.39575	-0.07491	-0.07114	0.01341	0.46323	-0.29648	0.34493	0.25644	0.24229	1	-0.25835	-0.0133	0.01621	-0.00178	0.5822	-0.29507	-0.04059	0.51248	0.21822	0.05406	0.12268	0.09532	0.37484	0.27982	0.4033	0.11502	0.24634	0.00968	0.20866	0.05641	0.14922	-0.19482	0.09875	0.4953	-0.11627	0.44554	-0.01553	0.2797	0.07185
MIA3	0.6493	0.9944	0.334	0.1865	0.8665	0.4097	0.0029	0.3552	0.7835	0.2962	0.104	0.7677	0.7791	0.9579	0.0529	0.2322	0.161	0.3043	0.3327		0.3006	0.9582	0.9491	0.9944	0.0112	0.2346	0.8729	0.0297	0.3844	0.8313	0.6277	0.7068	0.1254	0.2608	0.097	0.6495	0.3244	0.9696	0.406	0.8241	0.5546	0.4385	0.6967	0.0366	0.6459	0.0639	0.9512	0.261	0.7769
NCAM1	-0.27968	0.08978	0.45655	0.68013	0.53007	-0.01354	0.24913	0.5807	0.2557	0.03768	0.34907	0.58203	-0.02825	0.57865	-0.2771	0.0731	-0.06629	0.1794	0.07626	-0.25835	1	0.31394	0.13437	0.49085	0.20819	0.3881	0.50794	-0.05275	0.3625	0.31714	-0.20669	0.20725	-0.0029	0.23936	0.23495	-0.16508	0.00738	0.00531	0.34871	0.21338	-0.15699	0.80258	0.19746	-0.2145	0.67745	0.03775	0.24148	-0.05135	0.52339
NCAM1	0.261	0.7231	0.0568	0.0019	0.0237	0.9575	0.3188	0.0115	0.3058	0.882	0.1557	0.0113	0.9114	0.0119	0.2656	0.7732	0.7938	0.4763	0.7636	0.3006		0.2046	0.595	0.0386	0.4071	0.1115	0.0314	0.8353	0.1393	0.1997	0.4106	0.4093	0.9909	0.3388	0.348	0.5127	0.9768	0.9833	0.1561	0.3952	0.5339	<.0001	0.4322	0.3927	0.002	0.8818	0.3344	0.8396	0.0258
MEGF8	-0.24782	0.18775	0.28773	0.29089	0.73288	0.09757	-0.08537	0.46027	0.90742	0.26123	0.66691	0.60685	0.15365	0.78376	0.09746	0.10917	0.06413	0.40073	0.28491	-0.0133	0.31394	1	0.0872	0.38652	0.54032	-0.03514	0.44457	0.05889	0.08447	-0.04689	-0.14481	0.16521	0.74818	0.10703	-0.02514	-0.19196	0.84518	0.34752	0.50186	0.95642	0.46844	0.25756	0.36075	0.24544	0.60309	0.69594	0.16862	0.83797	0.47454
MEGF8	0.3214	0.4556	0.2469	0.2416	0.0005	0.7001	0.7363	0.0546	<.0001	0.2951	0.0025	0.0076	0.5427	0.0001	0.7004	0.6663	0.8004	0.0994	0.2518	0.9582	0.2046		0.7308	0.1131	0.0206	0.8899	0.0645	0.8165	0.739	0.8534	0.5664	0.5124	0.0004	0.6725	0.9211	0.4454	<.0001	0.1576	0.0338	<.0001	0.0499	0.3022	0.1414	0.3262	0.0081	0.0013	0.5036	<.0001	0.0466
NEO1	-0.09821	-0.03671	0.14632	0.13898	-0.02753	0.69312	0.42979	0.25346	-0.07914	0.13668	0.20464	-0.2499	0.31683	-0.04243	-0.19747	-0.02463	0.47798	0.1563	0.20646	0.01621	0.13437	0.0872	1	-0.05309	0.13948	-0.2618	-0.24734	0.24349	0.38681	0.20534	-0.0532	0.59311	-0.01321	0.54593	-0.18632	0.25492	0.14272	0.03238	-0.3316	0.11173	-0.04209	-0.14501	0.11274	-0.0227	-0.22119	0.17567	0.40287	0.01847	0.24664
NEO1	0.6983	0.885	0.5624	0.5823	0.9136	0.0014	0.0751	0.3102	0.7549	0.5886	0.4153	0.3173	0.2002	0.8673	0.4322	0.9227	0.0448	0.5357	0.4111	0.9491	0.595	0.7308		0.8343	0.5809	0.294	0.3224	0.3302	0.1128	0.4137	0.8339	0.0095	0.9585	0.0191	0.4592	0.3073	0.5721	0.8985	0.1789	0.6589	0.8683	0.5659	0.656	0.9288	0.3777	0.4857	0.0974	0.942	0.3238
PLXDC2	-0.1828	0.07497	0.51803	0.56537	0.46316	0.09247	0.1584	0.57505	0.1927	0.3244	0.39072	0.39866	0.03796	0.45716	0.15174	0.00263	-0.10801	0.44828	0.39336	-0.00178	0.49085	0.38652	-0.05309	1	0.14685	0.44397	0.30323	0.34021	0.54703	0.48933	0.04729	0.09313	0.19148	-0.07997	0.07148	-0.28621	0.41284	-0.00509	0.36825	0.22461	-0.0371	0.61093	-0.09227	-0.1917	0.47577	0.41782	0.34374	0.2559	0.39109
PLXDC2	0.4678	0.7675	0.0277	0.0145	0.0529	0.7151	0.5301	0.0125	0.4436	0.1891	0.1089	0.1013	0.8811	0.0565	0.5478	0.9917	0.6697	0.0621	0.1063	0.9944	0.0386	0.1131	0.8343		0.5609	0.0649	0.2212	0.1672	0.0188	0.0393	0.8522	0.7132	0.4466	0.7524	0.7781	0.2496	0.0886	0.984	0.1327	0.3702	0.8838	0.0071	0.7158	0.446	0.046	0.0845	0.1625	0.3054	0.1085
CRIM1	-0.12778	0.07943	0.38188	0.55429	0.35014	0.32087	0.54943	0.40714	0.6128	0.30878	0.7259	0.41033	0.08793	0.52687	0.11815	-0.02613	0.50614	0.24774	0.13247	0.5822	0.20819	0.54032	0.13948	0.14685	1	-0.06896	0.15273	0.07548	0.20069	-0.14775	-0.17282	-0.04735	0.62449	0.18	0.32727	-0.12694	0.50781	0.065	0.28117	0.534	0.1598	0.20797	0.14954	0.1583	0.41855	0.68264	-0.07132	0.54308	0.50352
CRIM1	0.6133	0.7541	0.1179	0.017	0.1543	0.1942	0.0182	0.0936	0.0069	0.2125	0.0006	0.0908	0.7286	0.0247	0.6405	0.918	0.0321	0.3216	0.6003	0.0112	0.4071	0.0206	0.5809	0.5609		0.7857	0.5452	0.766	0.4246	0.5585	0.4929	0.852	0.0056	0.4748	0.185	0.6157	0.0314	0.7978	0.2584	0.0225	0.5265	0.4076	0.5537	0.5304	0.0839	0.0018	0.7785	0.0199	0.0331
SPOCK2	0.44788	-0.40744	0.20998	0.46704	0.06507	-0.17937	-0.0467	0.15578	-0.13582	-0.21388	0.03416	0.25614	-0.0866	0.24493	-0.1454	0.25174	-0.20939	0.03456	0.03689	-0.29507	0.3881	-0.03514	-0.2618	0.44397	-0.06896	1	0.05111	-0.17078	0.29806	0.09076	-0.25139	-0.16425	-0.34732	-0.22348	0.31651	-0.31009	-0.166	-0.42232	0.0993	-0.07912	-0.28932	0.65112	-0.22559	-0.22087	0.38394	-0.02105	-0.02946	-0.12538	0.26333
SPOCK2	0.0623	0.0933	0.403	0.0507	0.7975	0.4764	0.854	0.5371	0.591	0.3941	0.893	0.3049	0.7326	0.3273	0.5648	0.3136	0.4043	0.8917	0.8844	0.2346	0.1115	0.8899	0.294	0.0649	0.7857		0.8404	0.4981	0.2296	0.7202	0.3143	0.5149	0.1579	0.3727	0.2007	0.2105	0.5103	0.0808	0.6951	0.755	0.2442	0.0034	0.3681	0.3785	0.1157	0.9339	0.9076	0.6201	0.2911
MMP2	-0.35167	0.51903	0.07985	0.20163	0.594	-0.16778	-0.10097	0.27738	0.47176	0.12555	0.1465	0.49096	-0.13931	0.46353	0.01641	0.09896	-0.00571	0.01839	-0.22848	-0.04059	0.50794	0.44457	-0.24734	0.30323	0.15273	0.05111	1	0.06803	-0.19513	0.07587	0.19985	0.08262	0.43255	0.12898	0.18558	0.11258	0.12779	0.23827	0.5893	0.39846	0.29297	0.55986	0.52971	0.26272	0.57135	-0.01728	-0.0712	0.09207	0.20507
MMP2	0.1524	0.0273	0.7528	0.4224	0.0093	0.5058	0.6902	0.2651	0.0481	0.6196	0.5619	0.0386	0.5814	0.0527	0.9485	0.696	0.9821	0.9422	0.3618	0.8729	0.0314	0.0645	0.3224	0.2212	0.5452	0.8404		0.7885	0.4378	0.7648	0.4266	0.7445	0.073	0.61	0.461	0.6565	0.6133	0.341	0.0101	0.1015	0.2381	0.0157	0.0238	0.2922	0.0133	0.9457	0.7789	0.7163	0.4143
EPHA7	-0.21941	0.1081	0.41341	0.22285	0.03653	0.36702	0.37412	0.41755	0.01237	0.46883	0.26655	-0.06242	-0.07934	0.10458	0.10173	-0.44875	0.05421	0.42742	0.57701	0.51248	-0.05275	0.05889	0.24349	0.34021	0.07548	-0.17078	0.06803	1	0.50882	0.54444	0.26102	0.18322	0.19656	0.14226	-0.05479	0.45264	0.3455	0.30713	0.21274	0.09966	0.36445	-0.05736	0.3832	0.32449	-0.0807	0.36248	0.3773	0.24234	-0.00983
EPHA7	0.3817	0.6694	0.0881	0.3741	0.8856	0.1341	0.1261	0.0847	0.9611	0.0497	0.285	0.8056	0.7543	0.6796	0.6879	0.0618	0.8308	0.0769	0.0122	0.0297	0.8353	0.8165	0.3302	0.1672	0.766	0.4981	0.7885		0.0311	0.0195	0.2955	0.4668	0.4344	0.5734	0.829	0.0593	0.1602	0.2151	0.3967	0.694	0.137	0.8211	0.1165	0.1889	0.7503	0.1393	0.1227	0.3326	0.9691
ACAN	-0.04888	-0.25233	0.82534	0.72231	0.14222	0.35345	0.63297	0.76363	-0.07635	0.45181	0.56623	0.00752	0.10105	0.22898	-0.10952	-0.19239	-0.02309	0.70158	0.67348	0.21822	0.3625	0.08447	0.38681	0.54703	0.20069	0.29806	-0.19513	0.50882	1	0.57621	-0.06158	0.35042	-0.07471	0.19317	0.02921	-0.03081	0.19256	-0.25178	-0.12757	0.03301	-0.23152	0.2627	-0.01996	-0.20069	0.08131	0.4881	0.76672	0.12496	0.51294
ACAN	0.8473	0.3124	<.0001	0.0007	0.5735	0.1502	0.0048	0.0002	0.7633	0.0598	0.0143	0.9764	0.6899	0.3607	0.6653	0.4444	0.9275	0.0012	0.0022	0.3844	0.1393	0.739	0.1128	0.0188	0.4246	0.2296	0.4378	0.0311		0.0123	0.8082	0.154	0.7683	0.4425	0.9084	0.9034	0.444	0.3135	0.6139	0.8966	0.3553	0.2923	0.9373	0.4246	0.7484	0.0399	0.0002	0.6213	0.0295
C8A	-0.22704	-0.11907	0.49737	0.41991	0.33727	0.48843	0.18585	0.39998	-0.09816	0.42162	0.04656	0.24776	0.21361	0.26119	-0.02176	0.2238	0.1301	0.42836	0.33803	0.05406	0.31714	-0.04689	0.20534	0.48933	-0.14775	0.09076	0.07587	0.54444	0.57621	1	0.1708	0.04823	-0.2729	-0.18603	0.07637	0.43414	-0.04609	0.12436	0.27086	-0.12898	-0.02275	0.32568	0.28747	-0.1411	0.25238	-0.04552	0.46832	-0.07717	0.48689
C8A	0.3649	0.6379	0.0357	0.0828	0.1711	0.0397	0.4603	0.1	0.6984	0.0814	0.8545	0.3216	0.3947	0.2951	0.9317	0.372	0.6069	0.0761	0.1701	0.8313	0.1997	0.8534	0.4137	0.0393	0.5585	0.7202	0.7648	0.0195	0.0123		0.498	0.8493	0.2732	0.4599	0.7633	0.0718	0.8559	0.623	0.277	0.61	0.9286	0.1872	0.2474	0.5765	0.3123	0.8577	0.05	0.7609	0.0404
PRG4	-0.19558	0.63314	-0.18682	-0.27691	0.08746	-0.06075	-0.05522	-0.19574	0.02616	0.03668	-0.26705	-0.21133	-0.5265	-0.17668	0.23015	-0.16143	-0.1847	-0.18926	-0.22383	0.12268	-0.20669	-0.14481	-0.0532	0.04729	-0.17282	-0.25139	0.19985	0.26102	-0.06158	0.1708	1	0.06001	0.19655	-0.13501	0.04428	0.19588	-0.11877	0.00254	-0.06055	-0.13361	0.16713	-0.03088	0.11936	-0.03964	-0.13644	-0.14461	-0.04904	-0.16663	-0.31154
PRG4	0.4367	0.0048	0.4579	0.266	0.73	0.8108	0.8277	0.4363	0.9179	0.8851	0.284	0.3999	0.0248	0.4831	0.3582	0.5222	0.4631	0.452	0.3719	0.6277	0.4106	0.5664	0.8339	0.8522	0.4929	0.3143	0.4266	0.2955	0.8082	0.498		0.813	0.4344	0.5932	0.8615	0.436	0.6388	0.992	0.8114	0.5971	0.5074	0.9032	0.6371	0.8759	0.5893	0.567	0.8468	0.5087	0.2082
CPZ	-0.1184	0.05357	0.20237	0.19619	0.23201	0.03478	0.40509	0.45268	-0.05693	-0.01461	0.26002	-0.33554	-0.04373	-0.08682	0.20167	-0.17189	-0.0862	0.27738	0.20507	0.09532	0.20725	0.16521	0.59311	0.09313	-0.04735	-0.16425	0.08262	0.18322	0.35042	0.04823	0.06001	1	0.11501	0.86058	-0.00973	-0.07904	0.18955	-0.06489	-0.09217	0.18925	-0.02475	-0.11944	0.16923	0.36316	-0.27415	0.19711	0.61355	0.08078	0.13675
CPZ	0.6398	0.8328	0.4206	0.4353	0.3542	0.891	0.0954	0.0592	0.8225	0.9541	0.2974	0.1734	0.8632	0.7319	0.4223	0.4952	0.7338	0.2651	0.4143	0.7068	0.4093	0.5124	0.0095	0.7132	0.852	0.5149	0.7445	0.4668	0.154	0.8493	0.813		0.6495	<.0001	0.9694	0.7552	0.4513	0.7981	0.7161	0.452	0.9223	0.6369	0.502	0.1385	0.2709	0.4331	0.0068	0.75	0.5884
ATP6AP2	-0.20761	0.52919	0.07265	0.05898	0.45683	-0.0098	0.07636	0.25652	0.76183	0.20278	0.6417	0.28732	-0.05256	0.4207	0.34884	-0.21281	0.11623	0.25515	0.17753	0.37484	-0.0029	0.74818	-0.01321	0.19148	0.62449	-0.34732	0.43255	0.19656	-0.07471	-0.2729	0.19655	0.11501	1	0.19293	-0.09101	-0.23483	0.78232	0.27328	0.26668	0.78656	0.37771	-0.01816	0.22537	0.42066	0.28649	0.71699	-0.0436	0.75824	0.08885
ATP6AP2	0.4084	0.0239	0.7745	0.8162	0.0567	0.9692	0.7633	0.3042	0.0002	0.4197	0.0041	0.2476	0.8359	0.0821	0.156	0.3965	0.646	0.3069	0.481	0.1254	0.9909	0.0004	0.9585	0.4466	0.0056	0.1579	0.073	0.4344	0.7683	0.2732	0.4344	0.6495		0.4431	0.7195	0.3483	0.0001	0.2725	0.2847	0.0001	0.1223	0.943	0.3686	0.0822	0.2491	0.0008	0.8636	0.0003	0.7259
COCH	-0.11602	0.00503	0.09789	0.24219	0.06621	0.01858	0.57493	0.36238	-0.0557	-0.09909	0.29872	-0.25061	-0.06615	-0.06644	0.16563	-0.31164	0.07708	0.0655	0.08098	0.27982	0.23936	0.10703	0.54593	-0.07997	0.18	-0.22348	0.12898	0.14226	0.19317	-0.18603	-0.13501	0.86058	0.19293	1	0.04093	-0.12367	0.16647	0.02569	-0.0645	0.1848	-0.10657	-0.10169	0.17581	0.46292	-0.23268	0.1801	0.35276	0.04562	0.03746
COCH	0.6466	0.9842	0.6992	0.3329	0.7941	0.9417	0.0126	0.1395	0.8263	0.6957	0.2286	0.3158	0.7942	0.7934	0.5113	0.2081	0.7611	0.7962	0.7494	0.2608	0.3388	0.6725	0.0191	0.7524	0.4748	0.3727	0.61	0.5734	0.4425	0.4599	0.5932	<.0001	0.4431		0.8719	0.6249	0.5091	0.9194	0.7993	0.4629	0.6738	0.6881	0.4853	0.053	0.3528	0.4745	0.151	0.8573	0.8827
CYR61	-0.12872	-0.1471	0.04234	0.49137	0.4137	-0.10874	0.26264	0.04484	0.06548	-0.27503	0.01045	0.29661	-0.31671	0.30401	0.18772	0.19522	0.10511	-0.08484	-0.20202	0.4033	0.23495	-0.02514	-0.18632	0.07148	0.32727	0.31651	0.18558	-0.05479	0.02921	0.07637	0.04428	-0.00973	-0.09101	0.04093	1	-0.02391	-0.19526	-0.36337	0.47888	-0.04687	0.11603	0.4637	0.00078	0.1584	0.41136	-0.04182	-0.31101	-0.0778	0.26253
CYR61	0.6107	0.5602	0.8675	0.0384	0.0879	0.6676	0.2924	0.8598	0.7963	0.2694	0.9672	0.232	0.2004	0.22	0.4557	0.4376	0.6781	0.7378	0.4214	0.097	0.348	0.9211	0.4592	0.7781	0.185	0.2007	0.461	0.829	0.9084	0.7633	0.8615	0.9694	0.7195	0.8719		0.925	0.4375	0.1383	0.0444	0.8535	0.6466	0.0526	0.9976	0.5301	0.0899	0.8691	0.209	0.759	0.2926
KCNG2	-0.1876	0.08987	0.10926	-0.15578	-0.10457	0.53393	0.0163	0.00842	-0.05804	0.45378	-0.27556	-0.11463	0.164	-0.09616	-0.32045	0.09306	0.37933	0.02926	-0.02601	0.11502	-0.16508	-0.19196	0.25492	-0.28621	-0.12694	-0.31009	0.11258	0.45264	-0.03081	0.43414	0.19588	-0.07904	-0.23483	-0.12367	-0.02391	1	-0.25241	0.38809	0.1604	-0.17827	0.4857	-0.19037	0.65553	0.11102	-0.16376	-0.29678	0.09802	-0.21227	0.06957
KCNG2	0.456	0.7229	0.666	0.5371	0.6797	0.0225	0.9488	0.9735	0.819	0.0586	0.2684	0.6506	0.5155	0.7043	0.1948	0.7134	0.1205	0.9083	0.9184	0.6495	0.5127	0.4454	0.3073	0.2496	0.6157	0.2105	0.6565	0.0593	0.9034	0.0718	0.436	0.7552	0.3483	0.6249	0.925		0.3123	0.1115	0.5249	0.4791	0.041	0.4493	0.0031	0.661	0.5161	0.2317	0.6988	0.3978	0.7838
PPT1	-0.15513	0.08218	0.24808	0.1791	0.44776	0.15675	0.04123	0.39892	0.70975	0.2752	0.68884	0.35193	0.13847	0.55019	0.28855	-0.18447	0.05363	0.44673	0.52014	0.24634	0.00738	0.84518	0.14272	0.41284	0.50781	-0.166	0.12779	0.3455	0.19256	-0.04609	-0.11877	0.18955	0.78232	0.16647	-0.19526	-0.25241	1	0.4143	0.35087	0.8583	0.40656	-0.04432	0.20052	0.36915	0.28393	0.85634	0.2103	0.93781	0.23902
PPT1	0.5388	0.7458	0.3209	0.477	0.0624	0.5345	0.871	0.101	0.001	0.269	0.0016	0.1521	0.5837	0.018	0.2455	0.4637	0.8326	0.0631	0.0269	0.3244	0.9768	<.0001	0.5721	0.0886	0.0314	0.5103	0.6133	0.1602	0.444	0.8559	0.6388	0.4513	0.0001	0.5091	0.4375	0.3123		0.0874	0.1534	<.0001	0.0941	0.8614	0.425	0.1317	0.2535	<.0001	0.4023	<.0001	0.3395
MFAP4	-0.33256	0.13405	-0.00171	-0.21664	0.11494	0.19837	-0.17421	0.06389	0.45428	0.34857	0.01718	0.33113	0.11937	0.28026	-0.03449	-0.16857	0.07659	-0.04385	0.14001	0.00968	0.00531	0.34752	0.03238	-0.00509	0.065	-0.42232	0.23827	0.30713	-0.25178	0.12436	0.00254	-0.06489	0.27328	0.02569	-0.36337	0.38809	0.4143	1	0.50686	0.3699	0.51499	-0.18257	0.64259	0.27159	0.09282	0.06022	0.00346	0.36597	-0.04231
MFAP4	0.1775	0.5959	0.9946	0.3879	0.6497	0.4301	0.4893	0.8012	0.0582	0.1563	0.946	0.1795	0.6371	0.26	0.8919	0.5037	0.7626	0.8628	0.5795	0.9696	0.9833	0.1576	0.8985	0.984	0.7978	0.0808	0.341	0.2151	0.3135	0.623	0.992	0.7981	0.2725	0.9194	0.1383	0.1115	0.0874		0.0318	0.1308	0.0287	0.4684	0.004	0.2756	0.7141	0.8124	0.9891	0.1353	0.8676
CDH16	-0.35095	0.02747	0.17437	0.33882	0.68599	-0.05531	-0.09393	0.26471	0.56894	0.14466	0.16137	0.7158	-0.07053	0.67753	0.21933	0.16819	0.01348	0.10642	0.04937	0.20866	0.34871	0.50186	-0.3316	0.36825	0.28117	0.0993	0.5893	0.21274	-0.12757	0.27086	-0.06055	-0.09217	0.26668	-0.0645	0.47888	0.1604	0.35087	0.50686	1	0.4427	0.55762	0.43256	0.53471	0.39122	0.65033	0.13605	-0.14951	0.40098	0.32989
CDH16	0.1533	0.9139	0.4889	0.169	0.0017	0.8274	0.7109	0.2884	0.0137	0.5668	0.5224	0.0008	0.7809	0.002	0.3819	0.5047	0.9577	0.6743	0.8457	0.406	0.1561	0.0338	0.1789	0.1327	0.2584	0.6951	0.0101	0.3967	0.6139	0.277	0.8114	0.7161	0.2847	0.7993	0.0444	0.5249	0.1534	0.0318		0.0658	0.0162	0.073	0.0222	0.1084	0.0035	0.5904	0.5538	0.0991	0.1813
DDR1	-0.17505	0.12652	0.16985	0.21232	0.64531	0.08649	-0.09266	0.36526	0.88496	0.12799	0.6629	0.5448	0.10524	0.72996	0.10012	0.01347	0.07822	0.34188	0.29698	0.05641	0.21338	0.95642	0.11173	0.22461	0.534	-0.07912	0.39846	0.09966	0.03301	-0.12898	-0.13361	0.18925	0.78656	0.1848	-0.04687	-0.17827	0.8583	0.3699	0.4427	1	0.43885	0.1589	0.42485	0.4003	0.5209	0.70289	0.10763	0.88369	0.39404
DDR1	0.4872	0.6169	0.5004	0.3977	0.0038	0.7329	0.7146	0.1361	<.0001	0.6128	0.0027	0.0194	0.6777	0.0006	0.6926	0.9577	0.7577	0.165	0.2314	0.8241	0.3952	<.0001	0.6589	0.3702	0.0225	0.755	0.1015	0.694	0.8966	0.61	0.5971	0.452	0.0001	0.4629	0.8535	0.4791	<.0001	0.1308	0.0658		0.0685	0.5288	0.0788	0.0998	0.0267	0.0011	0.6708	<.0001	0.1057
IGFALS	-0.27185	0.35198	0.05749	-0.17863	0.32826	0.04137	-0.2389	0.1073	0.57093	0.31639	0.0804	0.1753	-0.11708	0.3007	0.03969	-0.07377	-0.02952	0.12881	0.14247	0.14922	-0.15699	0.46844	-0.04209	-0.0371	0.1598	-0.28932	0.29297	0.36445	-0.23152	-0.02275	0.16713	-0.02475	0.37771	-0.10657	0.11603	0.4857	0.40656	0.51499	0.55762	0.43885	1	-0.16924	0.54694	0.38316	0.13554	0.23432	-0.07512	0.45236	-0.08296
IGFALS	0.2752	0.152	0.8208	0.4782	0.1835	0.8705	0.3397	0.6717	0.0133	0.2008	0.7511	0.4866	0.6436	0.2253	0.8758	0.7711	0.9074	0.6105	0.5728	0.5546	0.5339	0.0499	0.8683	0.8838	0.5265	0.2442	0.2381	0.137	0.3553	0.9286	0.5074	0.9223	0.1223	0.6738	0.6466	0.041	0.0941	0.0287	0.0162	0.0685		0.502	0.0188	0.1165	0.5918	0.3493	0.7671	0.0594	0.7435
LYPD6B	-0.18196	0.00954	0.27332	0.66159	0.52566	-0.01436	0.0903	0.32178	0.22008	-0.0671	0.16837	0.68091	-0.14053	0.6405	-0.19855	0.23011	-0.0013	0.01431	-0.10045	-0.19482	0.80258	0.25756	-0.14501	0.61093	0.20797	0.65112	0.55986	-0.05736	0.2627	0.32568	-0.03088	-0.11944	-0.01816	-0.10169	0.4637	-0.19037	-0.04432	-0.18257	0.43256	0.1589	-0.16924	1	0.06683	-0.28137	0.82829	-0.00785	-0.06845	-0.08833	0.47965
LYPD6B	0.4699	0.97	0.2725	0.0028	0.0251	0.9549	0.7216	0.1929	0.3802	0.7914	0.5042	0.0019	0.5781	0.0042	0.4296	0.3583	0.9959	0.9551	0.6917	0.4385	<.0001	0.3022	0.5659	0.0071	0.4076	0.0034	0.0157	0.8211	0.2923	0.1872	0.9032	0.6369	0.943	0.6881	0.0526	0.4493	0.8614	0.4684	0.073	0.5288	0.502		0.7922	0.258	<.0001	0.9753	0.7872	0.7274	0.044
MUC20	-0.26615	0.15014	0.23863	0.08786	0.35469	0.24229	0.02054	0.30854	0.4733	0.36647	0.1227	0.27975	-0.05553	0.37579	-0.16668	0.00249	0.1432	0.12178	0.02935	0.09875	0.19746	0.36075	0.11274	-0.09227	0.14954	-0.22559	0.52971	0.3832	-0.01996	0.28747	0.11936	0.16923	0.22537	0.17581	0.00078	0.65553	0.20052	0.64259	0.53471	0.42485	0.54694	0.06683	1	0.44058	0.21785	0.02853	0.2314	0.2486	0.31465
MUC20	0.2857	0.5521	0.3403	0.7288	0.1487	0.3327	0.9355	0.2129	0.0473	0.1347	0.6277	0.2609	0.8268	0.1243	0.5086	0.9922	0.5708	0.6302	0.908	0.6967	0.4322	0.1414	0.656	0.7158	0.5537	0.3681	0.0238	0.1165	0.9373	0.2474	0.6371	0.502	0.3686	0.4853	0.9976	0.0031	0.425	0.004	0.0222	0.0788	0.0188	0.7922		0.0673	0.3852	0.9105	0.3555	0.3199	0.2035
BID	0.19977	0.01965	-0.12107	-0.0365	0.2309	-0.12241	0.07914	0.06193	0.21971	-0.12682	0.21003	-0.04977	-0.07611	0.05585	0.57062	-0.04322	0.05134	0.08556	0.07699	0.4953	-0.2145	0.24544	-0.0227	-0.1917	0.1583	-0.22087	0.26272	0.32449	-0.20069	-0.1411	-0.03964	0.36316	0.42066	0.46292	0.1584	0.11102	0.36915	0.27159	0.39122	0.4003	0.38316	-0.28137	0.44058	1	-0.09473	0.23423	-0.04699	0.44956	-0.06749
BID	0.4267	0.9383	0.6323	0.8857	0.3566	0.6285	0.7549	0.8071	0.381	0.616	0.4029	0.8445	0.7641	0.8258	0.0134	0.8648	0.8397	0.7357	0.7614	0.0366	0.3927	0.3262	0.9288	0.446	0.5304	0.3785	0.2922	0.1889	0.4246	0.5765	0.8759	0.1385	0.0822	0.053	0.5301	0.661	0.1317	0.2756	0.1084	0.0998	0.1165	0.258	0.0673		0.7085	0.3495	0.8531	0.0612	0.7902
SHMT1	-0.26224	0.03719	0.24336	0.56832	0.75158	0.01568	-0.08297	0.28835	0.63066	0.02412	0.35296	0.94367	0.01141	0.90917	-0.07763	0.3329	0.05971	0.11836	-0.00446	-0.11627	0.67745	0.60309	-0.22119	0.47577	0.41855	0.38394	0.57135	-0.0807	0.08131	0.25238	-0.13644	-0.27415	0.28649	-0.23268	0.41136	-0.16376	0.28393	0.09282	0.65033	0.5209	0.13554	0.82829	0.21785	-0.09473	1	0.2114	-0.17457	0.32518	0.554
SHMT1	0.2931	0.8835	0.3305	0.0139	0.0003	0.9508	0.7434	0.2459	0.005	0.9243	0.1508	<.0001	0.9641	<.0001	0.7595	0.1771	0.8139	0.6399	0.986	0.6459	0.002	0.0081	0.3777	0.046	0.0839	0.1157	0.0133	0.7503	0.7484	0.3123	0.5893	0.2709	0.2491	0.3528	0.0899	0.5161	0.2535	0.7141	0.0035	0.0267	0.5918	<.0001	0.3852	0.7085		0.3997	0.4884	0.1879	0.0171
C16orf89	-0.07555	0.02163	0.5179	0.42983	0.3433	0.20572	0.35032	0.60009	0.5822	0.38704	0.89885	0.21862	0.16236	0.4595	0.1926	-0.27476	0.11493	0.67419	0.67352	0.44554	0.03775	0.69594	0.17567	0.41782	0.68264	-0.02105	-0.01728	0.36248	0.4881	-0.04552	-0.14461	0.19711	0.71699	0.1801	-0.04182	-0.29678	0.85634	0.06022	0.13605	0.70289	0.23432	-0.00785	0.02853	0.23423	0.2114	1	0.33891	0.84787	0.3692
C16orf89	0.7657	0.9321	0.0277	0.075	0.1631	0.4128	0.1541	0.0085	0.0112	0.1126	<.0001	0.3834	0.5198	0.0551	0.4439	0.2698	0.6498	0.0022	0.0022	0.0639	0.8818	0.0013	0.4857	0.0845	0.0018	0.9339	0.9457	0.1393	0.0399	0.8577	0.567	0.4331	0.0008	0.4745	0.8691	0.2317	<.0001	0.8124	0.5904	0.0011	0.3493	0.9753	0.9105	0.3495	0.3997		0.1689	<.0001	0.1316
BAMBI	-0.12035	-0.10438	0.7438	0.37752	0.15832	0.20921	0.3965	0.75538	-0.02265	0.55281	0.43171	-0.19262	0.17524	0.04642	-0.08956	-0.14711	-0.18273	0.71049	0.57201	-0.01553	0.24148	0.16862	0.40287	0.34374	-0.07132	-0.02946	-0.0712	0.3773	0.76672	0.46832	-0.04904	0.61355	-0.0436	0.35276	-0.31101	0.09802	0.2103	0.00346	-0.14951	0.10763	-0.07512	-0.06845	0.2314	-0.04699	-0.17457	0.33891	1	0.13204	0.42393
BAMBI	0.6343	0.6802	0.0004	0.1225	0.5304	0.4048	0.1033	0.0003	0.9289	0.0173	0.0736	0.4438	0.4867	0.8549	0.7238	0.5602	0.468	0.001	0.0131	0.9512	0.3344	0.5036	0.0974	0.1625	0.7785	0.9076	0.7789	0.1227	0.0002	0.05	0.8468	0.0068	0.8636	0.151	0.209	0.6988	0.4023	0.9891	0.5538	0.6708	0.7671	0.7872	0.3555	0.8531	0.4884	0.1689		0.6015	0.0796
PLD3	-0.05794	-0.00097	0.24124	0.17366	0.4983	0.10479	-0.0444	0.35593	0.77695	0.22008	0.71606	0.41021	0.18323	0.58041	0.28801	-0.07498	0.05836	0.50139	0.53025	0.2797	-0.05135	0.83797	0.01847	0.2559	0.54308	-0.12538	0.09207	0.24234	0.12496	-0.07717	-0.16663	0.08078	0.75824	0.04562	-0.0778	-0.21227	0.93781	0.36597	0.40098	0.88369	0.45236	-0.08833	0.2486	0.44956	0.32518	0.84787	0.13204	1	0.31362
PLD3	0.8194	0.9969	0.3349	0.4907	0.0353	0.679	0.8611	0.1472	0.0001	0.3802	0.0008	0.0909	0.4668	0.0116	0.2465	0.7675	0.8181	0.034	0.0236	0.261	0.8396	<.0001	0.942	0.3054	0.0199	0.6201	0.7163	0.3326	0.6213	0.7609	0.5087	0.75	0.0003	0.8573	0.759	0.3978	<.0001	0.1353	0.0991	<.0001	0.0594	0.7274	0.3199	0.0612	0.1879	<.0001	0.6015		0.205
GOT1	-0.09965	-0.27859	0.6393	0.73571	0.60702	0.49146	0.3277	0.62834	0.39126	0.39117	0.55935	0.51417	0.43319	0.61166	-0.10958	0.47614	0.43035	0.5442	0.22754	0.07185	0.52339	0.47454	0.24664	0.39109	0.50352	0.26333	0.20507	-0.00983	0.51294	0.48689	-0.31154	0.13675	0.08885	0.03746	0.26253	0.06957	0.23902	-0.04231	0.32989	0.39404	-0.08296	0.47965	0.31465	-0.06749	0.554	0.3692	0.42393	0.31362	1
GOT1	0.694	0.263	0.0043	0.0005	0.0076	0.0383	0.1843	0.0052	0.1084	0.1085	0.0158	0.029	0.0725	0.007	0.6651	0.0458	0.0746	0.0196	0.3638	0.7769	0.0258	0.0466	0.3238	0.1085	0.0331	0.2911	0.4143	0.9691	0.0295	0.0404	0.2082	0.5884	0.7259	0.8827	0.2926	0.7838	0.3395	0.8676	0.1813	0.1057	0.7435	0.044	0.2035	0.7902	0.0171	0.1316	0.0796	0.205
AHCY	-0.22336	-0.04435	0.14069	0.41793	0.62128	0.13645	-0.10055	0.14787	0.39495	0.06783	0.0323	0.73621	0.0479	0.66602	0.10055	0.49503	0.14843	-0.08087	-0.19227	-0.18221	0.5348	0.43439	-0.12226	0.57876	0.24497	0.30114	0.37106	-0.11782	-0.00569	0.36572	-0.13946	-0.204	0.03739	-0.23743	0.34231	-0.09511	0.21627	0.23163	0.67784	0.26671	0.12197	0.67285	0.12823	-0.18214	0.75981	0.0028	-0.14129	0.15361	0.50191
AHCY	0.373	0.8613	0.5777	0.0844	0.0059	0.5893	0.6914	0.5582	0.1048	0.7891	0.8988	0.0005	0.8503	0.0025	0.6914	0.0367	0.5567	0.7497	0.4447	0.4693	0.0222	0.0717	0.6289	0.0119	0.3272	0.2246	0.1295	0.6415	0.9821	0.1356	0.581	0.4168	0.8829	0.3428	0.1644	0.7074	0.3887	0.355	0.002	0.2847	0.6297	0.0022	0.6121	0.4695	0.0003	0.9912	0.576	0.5428	0.0338
PNP	0.73311	-0.26991	-0.02889	-0.13978	-0.01655	-0.14121	-0.3161	-0.10521	0.19913	-0.02441	0.17425	0.05654	0.30983	0.07839	0.26801	0.43467	-0.08886	0.12617	0.06797	-0.16496	-0.27962	0.22362	-0.21384	-0.22498	0.00539	0.19852	-0.18753	-0.25414	-0.1634	-0.25091	-0.38398	-0.20428	0.10583	-0.2202	-0.28153	-0.15604	0.21776	0.01494	-0.06819	0.28009	0.05745	-0.27856	-0.03473	0.31833	-0.00128	0.17649	-0.05039	0.39001	0.05991
PNP	0.0005	0.2787	0.9094	0.5801	0.948	0.5762	0.2013	0.6778	0.4283	0.9234	0.4892	0.8236	0.2109	0.7572	0.2823	0.0715	0.7259	0.6179	0.7887	0.513	0.2611	0.3724	0.3942	0.3694	0.9831	0.4297	0.4562	0.3088	0.5171	0.3152	0.1157	0.4162	0.676	0.3799	0.2577	0.5364	0.3854	0.9531	0.788	0.2603	0.8209	0.263	0.8912	0.1979	0.996	0.4836	0.8426	0.1096	0.8133
SDF4	-0.25758	0.25294	0.2566	0.43935	0.7767	0.27895	0.07749	0.37002	0.816	0.24014	0.51008	0.67849	0.12758	0.75749	0.07674	0.3572	0.42867	0.20282	-0.05778	0.16322	0.43175	0.78426	0.06518	0.30169	0.71761	0.00923	0.58349	-0.01822	-0.02138	0.08779	-0.067	-0.01189	0.59622	0.01802	0.36162	0.05855	0.50359	0.23926	0.64314	0.71777	0.42314	0.47028	0.45797	0.20567	0.73186	0.43821	-0.0874	0.55176	0.65692
SDF4	0.3021	0.3112	0.304	0.0681	0.0002	0.2623	0.7599	0.1307	<.0001	0.3371	0.0306	0.002	0.6139	0.0003	0.7622	0.1456	0.0759	0.4196	0.8198	0.5175	0.0736	0.0001	0.7972	0.2237	0.0008	0.971	0.011	0.9428	0.9329	0.729	0.7917	0.9626	0.009	0.9434	0.1403	0.8175	0.0331	0.339	0.004	0.0008	0.0802	0.0489	0.056	0.4129	0.0006	0.0689	0.7302	0.0176	0.0031
CALCB	-0.1971	0.33077	-0.00659	-0.21803	0.10346	0.27186	-0.05388	0.01508	0.34976	0.37343	-0.0877	0.0826	0.13368	0.05012	-0.19063	0.20581	0.32694	-0.16366	-0.37178	-0.1149	0.04791	0.17826	0.14286	-0.31905	0.1285	-0.44382	0.39058	-0.1332	-0.3237	0.00221	0.17838	0.04276	0.17263	0.08686	-0.27871	0.51521	-0.04766	0.56396	0.14682	0.18067	0.23874	-0.13373	0.69283	0.07736	-0.00753	-0.21196	0.07187	-0.02952	0.21065
CALCB	0.4331	0.18	0.9793	0.3848	0.6829	0.2751	0.8318	0.9526	0.1548	0.1269	0.7293	0.7445	0.5969	0.8435	0.4486	0.4126	0.1854	0.5164	0.1287	0.6498	0.8503	0.4791	0.5717	0.1969	0.6113	0.065	0.109	0.5983	0.1901	0.993	0.4788	0.8662	0.4933	0.7318	0.2627	0.0287	0.851	0.0148	0.561	0.4731	0.3401	0.5968	0.0014	0.7603	0.9764	0.3985	0.7769	0.9074	0.4014
CHMP4B	-0.12858	-0.24291	0.83167	0.79105	0.52178	0.41753	0.48467	0.85823	0.34083	0.52428	0.78063	0.32661	0.3303	0.56707	-0.02929	0.06843	0.20553	0.84269	0.65709	0.29816	0.40152	0.52138	0.305	0.54376	0.4725	0.24313	0.12844	0.43743	0.79534	0.49477	-0.27945	0.32648	0.23696	0.19772	0.18301	0.04531	0.48345	-0.0874	0.2676	0.4654	0.0971	0.33445	0.25628	0.11569	0.38467	0.68743	0.653	0.49643	0.78824
CHMP4B	0.6111	0.3314	<.0001	<.0001	0.0264	0.0847	0.0415	<.0001	0.1663	0.0255	0.0001	0.1859	0.1807	0.0141	0.9081	0.7873	0.4132	<.0001	0.003	0.2295	0.0986	0.0265	0.2184	0.0197	0.0477	0.331	0.6115	0.0695	<.0001	0.0368	0.2614	0.1861	0.3438	0.4316	0.4673	0.8583	0.0421	0.7302	0.283	0.0516	0.7015	0.1749	0.3046	0.6476	0.115	0.0016	0.0033	0.0361	0.0001
AKR1B1	-0.24996	0.13237	0.39117	0.33709	0.82608	0.09232	-0.12969	0.44421	0.8369	0.38173	0.50056	0.67154	0.14487	0.75349	0.11959	0.34275	0.0692	0.44917	0.16089	0.05293	0.29384	0.78833	-0.18118	0.30663	0.4275	-0.00741	0.54116	0.03779	0.07528	0.2586	0.0243	-0.00883	0.52911	-0.15001	0.15298	0.07942	0.53036	0.3406	0.65571	0.7383	0.42734	0.31238	0.57904	0.23827	0.64831	0.43379	0.20532	0.64958	0.66255
AKR1B1	0.3171	0.6006	0.1085	0.1713	<.0001	0.7156	0.608	0.0648	<.0001	0.118	0.0344	0.0023	0.5663	0.0003	0.6365	0.1638	0.785	0.0615	0.5236	0.8348	0.2366	0.0001	0.4719	0.2159	0.0768	0.9767	0.0204	0.8816	0.7665	0.3001	0.9238	0.9723	0.024	0.5524	0.5445	0.7541	0.0236	0.1666	0.0031	0.0005	0.0769	0.2069	0.0118	0.341	0.0036	0.0721	0.4137	0.0035	0.0027
APOM	0.48809	-0.21429	-0.4926	-0.41133	-0.3473	-0.38854	-0.4009	-0.44293	-0.37555	-0.56816	-0.4426	-0.36839	-0.24251	-0.38961	0.07095	-0.01884	-0.43893	-0.3665	-0.1597	-0.41563	-0.28254	-0.3112	-0.11675	-0.13755	-0.59341	0.40108	-0.24456	-0.28335	-0.20388	-0.31527	0.1835	0.14042	-0.31133	0.00921	-0.15642	-0.30415	-0.22797	-0.21092	-0.33976	-0.2095	-0.2658	-0.13243	-0.295	0.02075	-0.3614	-0.30638	-0.13695	-0.2187	-0.46125
APOM	0.0399	0.3932	0.0378	0.0899	0.1579	0.1111	0.0992	0.0656	0.1246	0.0139	0.0659	0.1325	0.3322	0.11	0.7796	0.9409	0.0684	0.1347	0.5267	0.0863	0.256	0.2087	0.6445	0.5862	0.0094	0.099	0.328	0.2545	0.4171	0.2025	0.4661	0.5784	0.2085	0.9711	0.5354	0.2198	0.3629	0.4008	0.1678	0.4041	0.2864	0.6004	0.2347	0.9349	0.1406	0.2162	0.5879	0.3833	0.054
AQP2	-0.10416	-0.28735	0.36381	0.35718	0.03463	0.14132	0.58239	0.31574	0.07341	0.3228	0.45319	-0.0608	0.19974	0.06987	0.24778	-0.14708	0.21552	0.43206	0.36804	0.75029	-0.26031	0.04758	0.06354	-0.16146	0.48528	-0.20783	-0.2375	0.20656	0.27902	-0.08907	-0.19822	0.16375	0.17254	0.28024	0.35281	0.02996	0.17284	-0.14602	0.05463	0.06799	0.12591	-0.29023	-0.05812	0.30028	-0.13779	0.44861	0.15966	0.26883	0.16894
AQP2	0.6808	0.2476	0.1378	0.1456	0.8915	0.5759	0.0112	0.2018	0.7722	0.1914	0.0589	0.8106	0.4268	0.7829	0.3215	0.5603	0.3904	0.0734	0.1329	0.0003	0.2968	0.8513	0.8022	0.5221	0.0412	0.4079	0.3426	0.4109	0.2622	0.7252	0.4304	0.5162	0.4936	0.26	0.151	0.9061	0.4928	0.5632	0.8295	0.7886	0.6186	0.2427	0.8188	0.226	0.5856	0.0619	0.5269	0.2807	0.5028
HLA_B	0.28621	-0.09338	-0.24054	-0.14146	-0.01547	-0.20333	-0.2897	-0.06527	0.03116	-0.35315	0.02381	0.06867	0.03293	0.05069	0.02501	-0.12948	-0.12602	-0.00702	0.20111	-0.03497	0.01079	0.08175	-0.07822	-0.15036	-0.19715	0.19283	0.21887	0.21583	-0.23403	-0.1593	-0.25633	0.06851	0.07822	0.17741	-0.01339	0.09134	0.1325	0.20872	0.24555	0.24056	0.27762	-0.0316	0.25672	0.63695	0.03266	-0.00241	-0.22506	0.22014	-0.25487
HLA_B	0.2496	0.7125	0.3363	0.5755	0.9514	0.4184	0.2436	0.7969	0.9023	0.1506	0.9253	0.7866	0.8968	0.8417	0.9215	0.6086	0.6183	0.978	0.4236	0.8904	0.9661	0.7471	0.7577	0.5515	0.433	0.4433	0.3829	0.3897	0.3499	0.5278	0.3045	0.7871	0.7577	0.4813	0.958	0.7185	0.6002	0.4059	0.326	0.3363	0.2647	0.9009	0.3038	0.0045	0.8976	0.9924	0.3692	0.3801	0.3074
CDC42	-0.09727	-0.31758	0.48999	0.85042	0.58533	0.36713	0.40338	0.52043	0.39908	0.16447	0.61263	0.6664	0.29633	0.74452	0.00036	0.33888	0.43445	0.37622	0.20167	0.23432	0.56203	0.51291	0.13634	0.49742	0.67937	0.41199	0.23541	0.02047	0.43991	0.28186	-0.42416	-0.00133	0.21416	0.07929	0.48165	-0.19348	0.34995	-0.15223	0.42528	0.44543	-0.10273	0.66434	0.06397	-0.01155	0.73428	0.48005	0.08963	0.37242	0.82288
CDC42	0.701	0.1991	0.039	<.0001	0.0107	0.1339	0.0969	0.0268	0.1009	0.5143	0.0069	0.0025	0.2325	0.0004	0.9989	0.1689	0.0716	0.1239	0.4223	0.3493	0.0152	0.0295	0.5896	0.0357	0.0019	0.0893	0.347	0.9358	0.0677	0.2572	0.0794	0.9958	0.3935	0.7545	0.043	0.4418	0.1546	0.5465	0.0785	0.064	0.685	0.0026	0.8009	0.9637	0.0005	0.0438	0.7236	0.128	<.0001
OLR1	0.10759	0.36886	0.0135	-0.20801	0.2586	-0.01699	-0.27236	0.03825	0.59085	0.19406	0.14716	0.13588	-0.09205	0.22784	0.0226	0.09736	0.03843	0.07137	-0.02228	0.07829	-0.13501	0.41361	-0.10441	-0.29868	0.2227	-0.20352	0.33468	0.15397	-0.3222	-0.15414	0.10681	-0.11201	0.41198	-0.1284	0.02112	0.46797	0.26644	0.40387	0.38112	0.47014	0.80073	-0.1934	0.64601	0.50301	0.12794	0.16782	-0.13659	0.4299	0.01638
OLR1	0.6709	0.132	0.9576	0.4075	0.3001	0.9466	0.2742	0.8802	0.0098	0.4403	0.5601	0.5909	0.7164	0.3632	0.9291	0.7007	0.8797	0.7784	0.9301	0.7575	0.5933	0.088	0.6801	0.2286	0.3744	0.4179	0.1746	0.5419	0.1923	0.5414	0.6732	0.6581	0.0894	0.6116	0.9337	0.0502	0.2852	0.0965	0.1187	0.049	<.0001	0.4419	0.0038	0.0334	0.6129	0.5057	0.5889	0.075	0.9486
NAGA	-0.13813	-0.14274	0.50227	0.36672	0.52308	0.13992	0.04102	0.59699	0.5336	0.27912	0.77432	0.35488	0.34673	0.50654	0.13918	-0.09283	-0.04013	0.82165	0.81007	0.19732	0.14104	0.6618	0.0946	0.41436	0.34232	0.01104	-0.01861	0.30322	0.46143	0.23931	-0.24255	0.20875	0.47365	0.03564	-0.05096	-0.21138	0.74967	0.15152	0.29477	0.66728	0.23952	0.00374	0.12121	0.25637	0.29048	0.79975	0.43988	0.83622	0.47857
NAGA	0.5847	0.5721	0.0337	0.1344	0.0259	0.5798	0.8716	0.0089	0.0226	0.262	0.0002	0.1484	0.1586	0.0319	0.5818	0.7141	0.8744	<.0001	<.0001	0.4326	0.5767	0.0028	0.7089	0.0873	0.1644	0.9653	0.9416	0.2213	0.0539	0.3389	0.3322	0.4058	0.0471	0.8883	0.8408	0.3998	0.0003	0.5484	0.2351	0.0025	0.3384	0.9883	0.6319	0.3045	0.2423	<.0001	0.0677	<.0001	0.0445
IGFBP3	-0.20651	0.41708	0.34088	0.09453	-0.00497	-0.15791	0.43503	0.33127	0.04029	0.43578	0.12763	-0.29321	-0.26549	-0.20573	0.25927	-0.2558	-0.18388	0.10183	-0.02883	0.25989	0.00158	-0.01653	0.00583	0.19586	0.19084	-0.23527	0.01662	0.0271	0.15943	-0.12068	0.33157	0.31531	0.15835	0.25182	0.00424	-0.10072	0.02341	0.02066	-0.04234	-0.16744	0.11078	-0.16348	-0.09302	-0.13986	-0.28099	0.15046	0.31581	-0.09451	-0.08802
IGFBP3	0.411	0.0851	0.1663	0.7091	0.9844	0.5314	0.0712	0.1793	0.8739	0.0706	0.6138	0.2377	0.287	0.4128	0.2988	0.3056	0.4651	0.6876	0.9096	0.2976	0.9951	0.9481	0.9817	0.436	0.4481	0.3473	0.9478	0.915	0.5274	0.6334	0.1789	0.2025	0.5303	0.3134	0.9867	0.6909	0.9265	0.9352	0.8675	0.5066	0.6617	0.5169	0.7135	0.5799	0.2587	0.5512	0.2017	0.7091	0.7284
GNB1	-0.17314	-0.27374	0.70951	0.7327	0.44199	0.29092	0.28035	0.71876	0.13043	0.36521	0.51033	0.45353	0.52411	0.47106	-0.32168	0.28861	0.16791	0.64427	0.40477	-0.15235	0.70306	0.26875	0.18542	0.47253	0.20584	0.38622	0.18842	-0.04525	0.60262	0.49393	-0.44527	0.14997	-0.14258	0.04789	0.11603	-0.04843	0.02472	-0.16564	0.16403	0.1434	-0.25771	0.54411	0.06391	-0.29633	0.48874	0.22081	0.51756	0.06124	0.80887
GNB1	0.492	0.2717	0.001	0.0005	0.0663	0.2415	0.2598	0.0008	0.606	0.1362	0.0305	0.0587	0.0256	0.0485	0.193	0.2454	0.5054	0.0039	0.0957	0.5462	0.0011	0.2809	0.4613	0.0477	0.4125	0.1134	0.454	0.8585	0.0081	0.0372	0.0641	0.5525	0.5725	0.8503	0.6466	0.8486	0.9224	0.5113	0.5154	0.5703	0.3019	0.0196	0.8011	0.2325	0.0396	0.3786	0.0278	0.8093	<.0001
CBR1	-0.19504	0.55288	-0.02232	-0.2268	0.16151	0.50544	-0.04319	0.08617	0.22525	0.4234	0.06759	-0.08346	0.39532	-0.0917	0.07267	0.20063	0.58537	0.11578	-0.11608	0.08247	-0.08035	0.24664	0.31926	0.08568	0.17081	-0.47973	0.36029	0.16572	-0.19607	0.14774	0.22581	0.11124	0.38903	0.04427	-0.29345	0.42559	0.20816	0.34757	0.09384	0.18688	0.30385	-0.16278	0.33568	0.14262	-0.08434	0.08425	0.04583	0.13406	0.16878
CBR1	0.438	0.0173	0.93	0.3655	0.522	0.0324	0.8649	0.7339	0.3688	0.08	0.7899	0.742	0.1044	0.7174	0.7744	0.4247	0.0107	0.6473	0.6465	0.7449	0.7513	0.3238	0.1966	0.7353	0.498	0.0439	0.1419	0.5111	0.4355	0.5585	0.3676	0.6604	0.1106	0.8615	0.2373	0.0783	0.4072	0.1576	0.7111	0.4578	0.2203	0.5187	0.1733	0.5724	0.7394	0.7396	0.8567	0.5959	0.5032
INPP1	-0.18474	0.02871	0.72706	0.46756	0.20745	0.23331	0.44515	0.7101	-0.01519	0.52732	0.33098	-0.01676	0.04724	0.16339	-0.19209	-0.09193	-0.17652	0.5231	0.38515	-0.10764	0.47443	0.08526	0.39794	0.35824	-0.07376	0.03613	0.09232	0.35308	0.75859	0.59069	0.12116	0.49523	-0.11047	0.29214	-0.24852	0.16565	0.01773	0.02429	-0.12416	0.01404	-0.17704	0.19382	0.29851	-0.21329	0.02677	0.13733	0.89089	-0.08103	0.43569
INPP1	0.463	0.91	0.0006	0.0504	0.4088	0.3515	0.0641	0.001	0.9523	0.0245	0.1797	0.9474	0.8523	0.5171	0.4451	0.7168	0.4835	0.0259	0.1145	0.6707	0.0467	0.7366	0.1019	0.1444	0.7712	0.8868	0.7156	0.1507	0.0003	0.0098	0.632	0.0366	0.6626	0.2395	0.32	0.5113	0.9443	0.9238	0.6235	0.9559	0.4822	0.4409	0.2289	0.3954	0.916	0.5869	<.0001	0.7492	0.0707
RAC2	0.35609	-0.42818	0.3321	0.57975	0.24168	0.1292	0.08216	0.27598	-0.07648	0.04743	0.18161	0.45082	0.41308	0.37792	0.04874	0.55371	0.16892	0.2139	0.09252	-0.1323	0.46281	0.08144	-0.10096	0.44392	0.08962	0.66674	0.10794	-0.07909	0.2664	0.33902	-0.5846	-0.20046	-0.27455	-0.16408	0.23286	-0.13651	-0.05081	-0.21213	0.27532	-0.02477	-0.23917	0.56012	-0.16259	-0.06511	0.5063	0.00679	0.00471	-0.02247	0.49021
RAC2	0.147	0.0763	0.1782	0.0117	0.334	0.6094	0.7459	0.2676	0.7629	0.8517	0.4708	0.0604	0.0884	0.122	0.8477	0.0171	0.5028	0.3941	0.715	0.6008	0.0531	0.748	0.6902	0.065	0.7236	0.0025	0.6699	0.7551	0.2853	0.1687	0.0108	0.4251	0.2702	0.5153	0.3524	0.5891	0.8413	0.3981	0.2688	0.9223	0.3392	0.0156	0.5192	0.7974	0.032	0.9787	0.9852	0.9295	0.0389
SERPINA4	-0.23853	0.07901	0.1697	-0.01942	0.35463	0.01539	-0.15785	0.19751	0.71144	0.28823	0.45224	0.43029	0.11056	0.47543	0.09865	-0.19224	-0.02808	0.38615	0.47947	0.33299	-0.14734	0.55353	-0.19488	-0.07939	0.37231	-0.31223	0.12512	0.30665	-0.0963	-0.02574	-0.04035	-0.18153	0.55022	-0.15426	0.0072	0.18015	0.60065	0.56906	0.51863	0.62075	0.67907	-0.22173	0.44918	0.44077	0.25548	0.51683	-0.05306	0.7635	0.08224
SERPINA4	0.3405	0.7553	0.5008	0.939	0.1487	0.9517	0.5316	0.4321	0.0009	0.2461	0.0595	0.0747	0.6623	0.0461	0.6969	0.4447	0.9119	0.1135	0.0441	0.1769	0.5596	0.0172	0.4384	0.7542	0.1281	0.2072	0.6208	0.2158	0.7039	0.9193	0.8737	0.471	0.018	0.5411	0.9774	0.4744	0.0084	0.0137	0.0274	0.006	0.0019	0.3766	0.0615	0.0671	0.3062	0.0281	0.8344	0.0002	0.7456
PGAM1	0.66512	-0.20142	0.09092	-0.14179	-0.00747	-0.09938	-0.23077	-0.0329	-0.09817	0.09857	-0.0001	-0.17667	0.35651	-0.19932	0.35298	0.5625	-0.119	0.24012	0.01492	-0.1818	-0.26929	-0.07425	-0.17674	-0.16484	-0.25436	0.10495	-0.23243	-0.25754	-0.01796	0.07969	-0.15379	-0.03545	-0.16272	-0.23159	-0.28306	-0.02946	-0.09802	-0.12719	-0.18865	-0.07997	-0.14812	-0.33803	-0.0741	0.17215	-0.21209	-0.07179	0.22413	0.07274	0.15445
PGAM1	0.0026	0.4229	0.7198	0.5746	0.9765	0.6948	0.3569	0.8969	0.6984	0.6972	0.9997	0.4831	0.1465	0.4278	0.1508	0.0151	0.6381	0.3372	0.9532	0.4703	0.2799	0.7697	0.4829	0.5133	0.3084	0.6785	0.3533	0.3022	0.9436	0.7533	0.5424	0.8889	0.5188	0.3551	0.2551	0.9076	0.6988	0.615	0.4534	0.7524	0.5575	0.1701	0.7701	0.4946	0.3982	0.7771	0.3713	0.7742	0.5406
CASP14	0.17143	-0.21278	0.67649	0.4006	-0.00449	0.08864	0.29692	0.60589	-0.24406	0.44334	0.32469	-0.12141	0.25752	-0.03855	0.13164	-0.05384	-0.24267	0.62965	0.62123	-0.01771	0.21012	-0.03306	0.12068	0.60713	-0.14841	0.28227	-0.27111	0.34812	0.71404	0.49417	-0.22475	0.23947	-0.22017	0.02596	-0.25933	-0.14272	0.15073	-0.08423	-0.08761	-0.16481	-0.19406	0.0259	-0.22602	-0.16785	-0.12199	0.28653	0.69781	0.06162	0.24343
CASP14	0.4964	0.3966	0.0021	0.0995	0.9859	0.7265	0.2315	0.0077	0.3291	0.0654	0.1886	0.6313	0.3022	0.8793	0.6026	0.832	0.3319	0.0051	0.0059	0.9444	0.4027	0.8964	0.6334	0.0075	0.5567	0.2564	0.2765	0.1569	0.0009	0.0371	0.3699	0.3385	0.38	0.9186	0.2987	0.5721	0.5505	0.7397	0.7296	0.5134	0.4404	0.9188	0.3672	0.5056	0.6297	0.249	0.0013	0.8081	0.3304
TXN	0.73583	-0.20789	0.20744	-0.01383	-0.1159	-0.06526	-0.03475	0.11534	-0.24457	0.06999	0.02904	-0.28506	0.2202	-0.27858	0.3582	0.36917	-0.16379	0.21639	0.11617	-0.16781	-0.08629	-0.15855	-0.0046	0.03138	-0.26214	0.21283	-0.31634	-0.06765	0.17655	0.17877	-0.21295	0.12276	-0.25476	-0.04733	-0.32235	-0.07113	-0.06291	-0.0625	-0.19427	-0.17149	-0.2146	-0.27224	-0.08356	0.17663	-0.2958	-0.04199	0.35072	0.01521	0.12544
TXN	0.0005	0.4078	0.4088	0.9566	0.647	0.797	0.8911	0.6486	0.328	0.7826	0.9089	0.2516	0.3799	0.263	0.1444	0.1316	0.5161	0.3884	0.6462	0.5057	0.7335	0.5297	0.9855	0.9016	0.2933	0.3965	0.2009	0.7897	0.4834	0.4779	0.3962	0.6275	0.3076	0.8521	0.192	0.7791	0.8042	0.8054	0.4398	0.4962	0.3925	0.2744	0.7417	0.4832	0.2333	0.8686	0.1536	0.9522	0.6199
FSHB	-0.18332	-0.0599	0.20499	0.57474	0.34619	0.08018	0.34207	0.16194	-0.00198	-0.12297	0.00976	0.37774	-0.26297	0.41334	0.0204	0.1579	-0.00362	-0.11507	-0.08063	0.04281	0.54266	-0.00153	0.16577	0.34959	0.20013	0.33073	0.01355	0.05784	0.3107	0.32949	0.01412	0.00419	-0.22899	0.01893	0.62659	-0.09328	-0.13675	-0.24511	0.26977	-0.12477	-0.01929	0.60735	-0.1853	-0.29266	0.5019	-0.06858	-0.09564	-0.20346	0.2239
FSHB	0.4665	0.8133	0.4145	0.0126	0.1593	0.7518	0.1647	0.5209	0.9938	0.6269	0.9693	0.1222	0.2918	0.0882	0.936	0.5315	0.9886	0.6494	0.7505	0.8661	0.02	0.9952	0.5109	0.155	0.4259	0.1801	0.9574	0.8197	0.2095	0.1818	0.9556	0.9868	0.3607	0.9406	0.0054	0.7128	0.5885	0.3269	0.279	0.6218	0.9394	0.0075	0.4617	0.2386	0.0338	0.7869	0.7058	0.4181	0.3718
RPS27A	-0.27062	0.62853	0.00239	-0.2299	-0.03918	0.19778	-0.02848	-0.05132	0.32251	0.52359	0.06054	0.15205	0.09563	0.06656	-0.00935	-0.0862	0.21501	-0.07106	-0.14215	0.08125	-0.10943	0.1641	-0.10882	0.06512	0.22848	-0.44092	0.32092	0.1299	-0.21287	-0.0209	0.38903	-0.37827	0.46637	-0.27224	-0.42814	0.19473	0.15904	0.39374	-0.01566	0.09666	0.17221	-0.05835	0.12755	-0.207	0.08654	0.07967	-0.15372	0.05649	-0.15028
RPS27A	0.2774	0.0052	0.9925	0.3588	0.8773	0.4315	0.9107	0.8397	0.1918	0.0257	0.8114	0.547	0.7058	0.793	0.9706	0.7338	0.3916	0.7793	0.5737	0.7486	0.6656	0.5153	0.6673	0.7974	0.3618	0.067	0.1941	0.6074	0.3964	0.9344	0.1106	0.1217	0.0511	0.2744	0.0763	0.4387	0.5285	0.106	0.9508	0.7028	0.4944	0.8181	0.614	0.4098	0.7328	0.7533	0.5425	0.8238	0.5517
TFF3	-0.13657	-0.14839	0.00944	0.39174	0.18105	0.03789	0.3598	0.25909	-0.05154	-0.24385	0.09829	0.08895	-0.13606	0.16871	-0.07565	-0.1289	0.14589	-0.09945	-0.09205	0.1206	0.43761	0.07452	0.26969	0.13628	0.11114	0.28118	0.43871	0.08136	0.12704	-0.03141	-0.07188	0.56191	0.01217	0.69986	0.34722	-0.03834	-0.02394	-0.03158	0.22541	0.15483	-0.15948	0.42899	0.2995	0.32695	0.15073	-0.02898	0.08297	-0.10725	0.19714
TFF3	0.5889	0.5568	0.9703	0.1079	0.4722	0.8813	0.1425	0.2992	0.8391	0.3295	0.698	0.7256	0.5904	0.5034	0.7655	0.6102	0.5635	0.6946	0.7164	0.6336	0.0693	0.7689	0.2791	0.5898	0.6606	0.2584	0.0686	0.7483	0.6154	0.9015	0.7768	0.0152	0.9618	0.0012	0.158	0.8799	0.9249	0.901	0.3685	0.5396	0.5273	0.0757	0.2273	0.1854	0.5505	0.9091	0.7434	0.6719	0.433
TFF1	-0.20584	0.04936	0.70527	0.59466	0.37492	0.12953	0.27938	0.70045	-0.07876	0.48313	0.28887	0.16115	0.11328	0.23431	0.00921	0.02896	-0.1061	0.63986	0.45114	0.09168	0.46179	0.08175	-0.0094	0.76402	-0.05568	0.35476	0.30889	0.49498	0.66362	0.70113	0.03181	0.19436	-0.10935	-0.03268	0.17962	0.12853	0.03799	-0.16045	0.29384	-0.07999	0.03648	0.47796	0.07542	-0.11345	0.27196	0.18639	0.55644	-0.039	0.41805
TFF1	0.4125	0.8458	0.0011	0.0092	0.1253	0.6085	0.2615	0.0012	0.7561	0.0422	0.245	0.5229	0.6545	0.3493	0.9711	0.9092	0.6752	0.0042	0.0602	0.7175	0.0537	0.7471	0.9705	0.0002	0.8263	0.1486	0.2123	0.0368	0.0027	0.0012	0.9003	0.4396	0.6658	0.8976	0.4757	0.6113	0.881	0.5248	0.2366	0.7524	0.8857	0.0448	0.7661	0.654	0.2749	0.459	0.0165	0.8779	0.0843
IGKV4_1	-0.02454	0.13713	-0.26426	-0.34246	-0.11969	-0.15853	-0.25354	-0.15026	-0.2887	-0.11065	-0.39194	-0.38082	-0.25002	-0.32913	0.15505	-0.20249	-0.32206	-0.10288	0.01452	-0.12352	-0.28326	-0.17205	-0.03015	0.23999	-0.56247	0.12529	0.09955	0.25424	-0.04812	0.04674	0.5145	0.32344	-0.10147	0.07977	-0.09552	0.05425	-0.03462	0.00962	-0.02628	-0.16483	0.12865	-0.08439	-0.0313	0.10839	-0.35457	-0.16605	0.08968	-0.16035	-0.42899
IGKV4_1	0.923	0.5874	0.2893	0.1642	0.6362	0.5298	0.31	0.5518	0.2453	0.662	0.1077	0.119	0.317	0.1823	0.539	0.4204	0.1925	0.6846	0.9544	0.6253	0.2547	0.4948	0.9055	0.3375	0.0151	0.6203	0.6943	0.3087	0.8496	0.8539	0.0289	0.1905	0.6887	0.753	0.7061	0.8307	0.8915	0.9698	0.9175	0.5134	0.6109	0.7392	0.9019	0.6686	0.1488	0.5102	0.7234	0.525	0.0757
[truncated: 26 more columns]

## Sheet: Sppl. Table 2B, Control
Supplementary table 2B. Pearson's correlation matrix of proteins selected frm the proteins in Table 2. Analysis of 53 proteins detected in control group are shown. Correlation coefficients (γ) are presented in the upper row and p-values in the lower row. Color scheme for γ is gray: 0.0 to ±0.2, black: ±0.2 to ±0.4, blue: ±0.4 to ±0.7, red: ±0.7 to ±1.0. Color scheme for p-values is gray: ≥0.05, b…
	HBD	TMEM256	TTC26	DCD	S100A6	FXYD2	FCN2	EFNA1	CD9	PDGFB	APOC3	SIRPB1	GP2	CHMP1B	CLEC4G	GBP4	GNL1	YWHAG	ALDOC	ADAMTSL4	SORD	SFRP4	PODXL	C9	HSP90AB1	TMED7	CIT	CTSL	ITIH2	CILP2	PECAM1	OGN	CD93	PDGFRA	AZGP1	CFD	GPRC5C	LAIR1	BGN	LAMC1	C7	PSAP	MAN1A1	RDX	GAA	CPVL	HEXB	CNTN1	PGA3
HBD	1	-0.31074	-0.14365	0.00691	-0.19285	-0.08409	0.43314	0.00528	-0.29312	-0.08484	0.21844	-0.12651	-0.08255	-0.118	-0.19639	-0.15899	-0.31653	-0.11232	-0.12064	-0.11925	-0.17214	-0.22715	0.00863	0.30537	-0.12064	-0.06453	0.12242	0.36433	0.17706	-0.12487	-0.20941	0.04499	-0.15008	-0.23468	-0.19223	0.26479	0.23645	-0.09895	-0.44134	-0.15383	-0.22505	-0.21326	-0.19781	-0.31787	0.08979	0.06143	-0.29597	-0.26862	-0.17424
HBD		0.2095	0.5696	0.9783	0.4433	0.7401	0.0726	0.9834	0.2378	0.7378	0.3838	0.6169	0.7447	0.641	0.4348	0.5286	0.2006	0.6572	0.6335	0.6374	0.4946	0.3647	0.9729	0.2179	0.6335	0.7992	0.6284	0.1372	0.4821	0.6215	0.4043	0.8593	0.5522	0.3486	0.4448	0.2883	0.3448	0.6961	0.0667	0.5422	0.3693	0.3955	0.4314	0.1986	0.7231	0.8087	0.2331	0.2811	0.4893
TMEM256	-0.31074	1	0.06976	-0.2341	-0.08834	0.75869	-0.27218	-0.22085	0.13363	-0.23144	-0.04344	0.80461	-0.07825	-0.11367	0.80588	-0.1784	-0.41306	0.19876	0.60855	-0.18376	0.37099	-0.11232	0.20221	0.53765	-0.00489	0.33907	-0.34889	-0.01217	-0.27081	0.07574	0.36694	0.58351	-0.01539	0.1992	0.45976	0.18675	-0.11695	0.75916	-0.05815	-0.06346	0.43993	0.31061	-0.0121	0.28626	0.18842	0.32064	0.48919	0.46015	0.39459
TMEM256	0.2095		0.7833	0.3498	0.7274	0.0003	0.2746	0.3785	0.5971	0.3555	0.8641	<.0001	0.7576	0.6534	<.0001	0.4788	0.0884	0.4291	0.0074	0.4655	0.1296	0.6572	0.421	0.0214	0.9846	0.1687	0.1559	0.9618	0.2771	0.7652	0.1342	0.011	0.9517	0.4281	0.0549	0.4581	0.644	0.0003	0.8187	0.8025	0.0677	0.2097	0.962	0.2495	0.454	0.1945	0.0394	0.0547	0.1051
TTC26	-0.14365	0.06976	1	-0.08753	0.33178	-0.17909	-0.05972	0.01179	0.07465	-0.18845	0.27288	0.07869	0.18625	-0.11235	-0.15246	-0.08103	-0.11242	0.88338	0.49015	-0.16233	0.43467	0.27259	0.42043	0.0313	0.47433	0.20438	-0.14262	-0.3432	0.05648	0.81358	0.28736	-0.02412	-0.30649	0.21151	0.09496	0.00087	-0.09378	0.03319	0.40402	-0.1692	0.06686	-0.27722	0.35744	-0.17666	-0.08495	-0.15221	0.15093	0.35429	-0.07895
TTC26	0.5696	0.7833		0.7298	0.1786	0.4771	0.8139	0.963	0.7685	0.4539	0.2733	0.7563	0.4593	0.6572	0.5459	0.7493	0.6569	<.0001	0.0389	0.5199	0.0714	0.2738	0.0823	0.9019	0.0467	0.4159	0.5724	0.1632	0.8239	<.0001	0.2476	0.9243	0.2161	0.3995	0.7078	0.9973	0.7113	0.896	0.0963	0.5021	0.7921	0.2654	0.1453	0.4831	0.7375	0.5465	0.55	0.1492	0.7555
DCD	0.00691	-0.2341	-0.08753	1	-0.16413	-0.32474	0.19265	0.15304	-0.13646	0.02337	0.29521	-0.28109	0.6345	0.19046	-0.26836	-0.14458	0.29318	-0.37961	-0.21015	0.52851	-0.39625	-0.17391	-0.15188	-0.3908	-0.06502	-0.08046	0.53657	-0.02415	-0.12366	-0.1539	0.15354	-0.05976	0.0093	-0.20454	-0.40036	0.06121	0.1259	0.0994	0.32352	0.41733	0.03566	0.2929	0.62674	0.35577	0.05975	-0.12384	-0.28967	-0.02181	-0.12832
DCD	0.9783	0.3498	0.7298		0.5152	0.1886	0.4437	0.5443	0.5893	0.9267	0.2343	0.2585	0.0047	0.449	0.2816	0.567	0.2377	0.1202	0.4026	0.0241	0.1035	0.4901	0.5474	0.1088	0.7977	0.751	0.0217	0.9242	0.6249	0.542	0.543	0.8138	0.9708	0.4155	0.0997	0.8093	0.6186	0.6948	0.1903	0.0849	0.8883	0.2382	0.0054	0.1474	0.8138	0.6244	0.2436	0.9316	0.6118
S100A6	-0.19285	-0.08834	0.33178	-0.16413	1	-0.0111	-0.1866	-0.0075	0.49383	0.15415	0.25196	-0.22677	0.01042	-0.17609	-0.13625	-0.18289	-0.07467	0.27693	-0.13711	0.03256	0.5024	0.41449	0.15878	-0.07976	0.32132	0.07132	-0.25345	-0.17633	0.44805	0.2488	-0.13603	-0.15017	0.22177	0.49906	0.03716	0.33907	-0.04849	-0.16146	0.18694	-0.19826	0.11246	-0.13608	0.23286	-0.10725	0.12877	-0.05482	0.58761	0.03787	-0.12987
S100A6	0.4433	0.7274	0.1786	0.5152		0.9651	0.4584	0.9764	0.0373	0.5414	0.3132	0.3655	0.9673	0.4846	0.5898	0.4676	0.7684	0.2659	0.5875	0.898	0.0336	0.0872	0.5292	0.7531	0.1935	0.7785	0.3102	0.484	0.0622	0.3195	0.5904	0.552	0.3765	0.035	0.8836	0.1687	0.8485	0.5221	0.4576	0.4303	0.6568	0.5903	0.3524	0.6719	0.6106	0.829	0.0103	0.8814	0.6075
FXYD2	-0.08409	0.75869	-0.17909	-0.32474	-0.0111	1	0.0017	-0.27237	0.15688	-0.08171	-0.20933	0.71388	-0.20691	-0.23778	0.7247	-0.29056	-0.32603	0.02603	0.27368	-0.13824	0.11952	0.03412	-0.00629	0.64005	-0.29185	0.2633	-0.25255	0.03975	-0.23591	-0.10509	0.14798	0.71964	0.10696	0.16907	0.57133	0.288	-0.26059	0.48311	-0.36054	-0.05642	0.28997	0.22291	-0.15441	0.23506	0.09695	0.19034	0.53118	0.1368	0.35361
FXYD2	0.7401	0.0003	0.4771	0.1886	0.9651		0.9946	0.2742	0.5342	0.7472	0.4045	0.0009	0.4101	0.3421	0.0007	0.2421	0.1867	0.9183	0.2718	0.5844	0.6367	0.8931	0.9802	0.0042	0.24	0.2911	0.312	0.8756	0.346	0.6781	0.5579	0.0008	0.6727	0.5024	0.0133	0.2465	0.2963	0.0423	0.1416	0.824	0.2431	0.374	0.5407	0.3478	0.7019	0.4493	0.0233	0.5883	0.15
FCN2	0.43314	-0.27218	-0.05972	0.19265	-0.1866	0.0017	1	0.28327	-0.29804	-0.08524	0.42875	-0.0306	0.30589	-0.09869	-0.03899	-0.28261	0.11611	-0.15047	-0.20044	0.28167	-0.09113	-0.08377	-0.09771	0.36543	-0.42181	-0.00717	0.49265	0.05348	0.37038	-0.0916	0.11801	0.37686	0.05777	-0.25474	-0.03788	0.23191	-0.16548	-0.33983	0.03641	0.09123	0.08671	-0.09978	0.26204	-0.21977	-0.27997	-0.1194	-0.21096	-0.06068	-0.00782
FCN2	0.0726	0.2746	0.8139	0.4437	0.4584	0.9946		0.2547	0.2297	0.7367	0.0758	0.9041	0.217	0.6968	0.8779	0.2558	0.6464	0.5512	0.4252	0.2575	0.7191	0.741	0.6997	0.1359	0.0812	0.9775	0.0378	0.8331	0.1303	0.7177	0.641	0.1232	0.8199	0.3077	0.8814	0.3545	0.5117	0.1677	0.8859	0.7188	0.7323	0.6936	0.2935	0.3809	0.2605	0.637	0.4007	0.811	0.9754
EFNA1	0.00528	-0.22085	0.01179	0.15304	-0.0075	-0.27237	0.28327	1	0.07248	0.30758	0.38377	-0.14215	0.46555	0.25143	-0.16803	-0.33863	-0.03338	-0.053	0.0617	0.56792	0.02017	-0.10261	-0.16352	-0.08785	0.15691	0.18508	0.69789	0.46996	-0.03374	0.2405	0.59678	0.18286	0.69943	-0.00768	-0.32738	0.04574	0.30056	-0.17785	-0.16634	0.05211	0.56167	0.09833	0.04003	-0.00083	0.03515	0.39523	-0.22439	0.44954	0.10817
EFNA1	0.9834	0.3785	0.963	0.5443	0.9764	0.2742	0.2547		0.775	0.2144	0.1159	0.5737	0.0515	0.3142	0.5051	0.1693	0.8954	0.8345	0.8078	0.0139	0.9367	0.6854	0.5168	0.7289	0.5341	0.4622	0.0013	0.0491	0.8943	0.3364	0.0089	0.4677	0.0012	0.9759	0.1848	0.857	0.2256	0.4801	0.5095	0.8373	0.0153	0.6979	0.8747	0.9974	0.8899	0.1045	0.3707	0.0613	0.6692
CD9	-0.29312	0.13363	0.07465	-0.13646	0.49383	0.15688	-0.29804	0.07248	1	0.27912	0.11966	0.01715	-0.3257	0.34582	-0.02814	-0.09408	0.08025	-0.00246	-0.04857	0.24455	0.40176	0.14311	0.13643	0.07177	0.47745	-0.31657	-0.01971	-0.01088	0.00942	0.31787	0.11641	-0.10763	0.24669	0.56706	0.04492	-0.1174	0.34355	0.14802	0.06316	0.12819	0.08608	-0.12073	0.18523	0.37098	0.43214	0.46979	0.58475	0.38187	0.31411
CD9	0.2378	0.5971	0.7685	0.5893	0.0373	0.5342	0.2297	0.775		0.262	0.6363	0.9462	0.1872	0.1598	0.9117	0.7104	0.7516	0.9923	0.8482	0.3281	0.0984	0.571	0.5893	0.7772	0.0451	0.2006	0.9381	0.9658	0.9704	0.1986	0.6455	0.6708	0.3237	0.0141	0.8595	0.6427	0.1628	0.5578	0.8034	0.6122	0.7341	0.6332	0.4618	0.1296	0.0733	0.0492	0.0108	0.1179	0.2043
PDGFB	-0.08484	-0.23144	-0.18845	0.02337	0.15415	-0.08171	-0.08524	0.30758	0.27912	1	-0.11694	-0.15806	-0.04379	0.75944	-0.13593	-0.29338	0.28363	-0.18416	-0.03534	0.62602	0.15694	0.32322	-0.19944	-0.31305	0.30065	0.07043	0.28259	0.16849	0.04286	0.28577	0.29881	-0.17586	0.47093	0.33616	0.0204	0.11679	0.64976	-0.15444	-0.23293	0.09372	0.30596	0.52226	0.06425	0.20929	0.66024	0.43904	0.00153	0.38151	-0.08656
PDGFB	0.7378	0.3555	0.4539	0.9267	0.5414	0.7472	0.7367	0.2144	0.262		0.644	0.5311	0.863	0.0003	0.5907	0.2374	0.254	0.4645	0.8893	0.0054	0.534	0.1908	0.4275	0.2059	0.2254	0.7812	0.2559	0.5039	0.8659	0.2503	0.2284	0.4852	0.0485	0.1726	0.936	0.6444	0.0035	0.5406	0.3523	0.7115	0.2169	0.0262	0.8001	0.4046	0.0029	0.0683	0.9952	0.1183	0.7327
APOC3	0.21844	-0.04344	0.27288	0.29521	0.25196	-0.20933	0.42875	0.38377	0.11966	-0.11694	1	-0.30721	0.48356	0.01496	-0.06508	-0.3261	-0.3266	0.13587	-0.07604	0.32891	0.35831	-0.44058	0.22824	0.30078	0.10986	0.10222	0.46294	-0.11447	0.39085	0.21458	0.30289	0.05906	0.18366	0.25121	-0.31532	0.11837	0.05258	-0.07712	0.24175	0.12302	0.38518	-0.23066	0.4335	-0.15538	-0.05643	0.23115	0.0113	0.32247	-0.28902
APOC3	0.3838	0.8641	0.2733	0.2343	0.3132	0.4045	0.0758	0.1159	0.6363	0.644		0.2149	0.042	0.953	0.7975	0.1866	0.1859	0.5909	0.7643	0.1826	0.1443	0.0673	0.3623	0.2252	0.6643	0.6865	0.053	0.6511	0.1088	0.3925	0.2218	0.8159	0.4657	0.3146	0.2025	0.6399	0.8358	0.761	0.3338	0.6267	0.1145	0.3571	0.0723	0.5381	0.824	0.3561	0.9645	0.1919	0.2447
SIRPB1	-0.12651	0.80461	0.07869	-0.28109	-0.22677	0.71388	-0.0306	-0.14215	0.01715	-0.15806	-0.30721	1	-0.12726	-0.07362	0.75615	-0.0494	-0.15191	0.1801	0.64443	-0.14451	0.22673	0.15486	0.22084	0.50872	-0.08914	0.29274	-0.33315	0.18015	-0.24833	0.09744	0.38909	0.71268	-0.08493	-0.07731	0.55856	0.32388	-0.05246	0.71323	-0.15516	-0.15967	0.27517	0.36957	-0.09324	0.22524	0.15986	0.24049	0.44844	0.37161	0.5737
SIRPB1	0.6169	<.0001	0.7563	0.2585	0.3655	0.0009	0.9041	0.5737	0.9462	0.5311	0.2149		0.6148	0.7716	0.0003	0.8457	0.5473	0.4745	0.0039	0.5673	0.3656	0.5395	0.3785	0.0311	0.725	0.2384	0.1767	0.4744	0.3204	0.7005	0.1105	0.0009	0.7376	0.7604	0.016	0.1898	0.8362	0.0009	0.5387	0.5268	0.2691	0.1312	0.7129	0.3688	0.5263	0.3364	0.062	0.1289	0.0128
GP2	-0.08255	-0.07825	0.18625	0.6345	0.01042	-0.20691	0.30589	0.46555	-0.3257	-0.04379	0.48356	-0.12726	1	-0.08997	0.03599	-0.17196	0.06719	-0.00312	-0.12998	0.43418	-0.1562	-0.13978	0.07655	-0.21757	-0.27638	0.38189	0.55555	0.12218	-0.06319	-0.00071	0.43487	0.17979	0.3221	-0.01069	-0.04909	0.19397	-0.17908	0.09888	0.34014	0.06058	0.33953	0.2508	0.40852	-0.02376	-0.19654	-0.00141	-0.07261	0.08315	-0.21587
GP2	0.7447	0.7576	0.4593	0.0047	0.9673	0.4101	0.217	0.0515	0.1872	0.863	0.042	0.6148		0.7226	0.8872	0.4951	0.7911	0.9902	0.6072	0.0718	0.5359	0.5801	0.7627	0.3858	0.2669	0.1178	0.0167	0.6291	0.8033	0.9978	0.0713	0.4753	0.1924	0.9664	0.8466	0.4406	0.4771	0.6963	0.1673	0.8113	0.1681	0.3155	0.0923	0.9254	0.4344	0.9956	0.7746	0.7429	0.3896
CHMP1B	-0.118	-0.11367	-0.11235	0.19046	-0.17609	-0.23778	-0.09869	0.25143	0.34582	0.75944	0.01496	-0.07362	-0.08997	1	-0.12937	-0.09624	0.28044	-0.14019	0.14836	0.6559	0.16289	-0.0637	0.05298	-0.27856	0.40922	-0.12565	0.35026	-0.01822	0.01648	0.32137	0.40346	-0.28147	0.12169	0.17036	-0.23778	-0.05677	0.80966	0.07302	0.0068	0.23099	0.19777	0.43333	0.18499	0.47687	0.66905	0.57251	-0.08273	0.56609	-0.03436
CHMP1B	0.641	0.6534	0.6572	0.449	0.4846	0.3421	0.6968	0.3142	0.1598	0.0003	0.953	0.7716	0.7226		0.6089	0.704	0.2597	0.579	0.5569	0.0031	0.5184	0.8017	0.8346	0.263	0.0917	0.6193	0.1542	0.9428	0.9482	0.1935	0.0969	0.2578	0.6305	0.4991	0.3421	0.8229	<.0001	0.7734	0.9786	0.3564	0.4315	0.0724	0.4624	0.0454	0.0024	0.013	0.7442	0.0143	0.8923
CLEC4G	-0.19639	0.80588	-0.15246	-0.26836	-0.13625	0.7247	-0.03899	-0.16803	-0.02814	-0.13593	-0.06508	0.75615	0.03599	-0.12937	1	0.02955	-0.16372	0.04744	0.31492	-0.01894	0.3233	-0.06718	0.31462	0.62247	-0.32317	0.37943	-0.24796	0.13077	-0.20443	-0.20451	0.38171	0.6513	0.07775	-0.00318	0.56175	0.30041	-0.18628	0.66214	-0.0657	-0.03591	0.46563	0.40088	-0.2337	0.05949	-0.00405	0.33621	0.56253	0.21211	0.19215
CLEC4G	0.4348	<.0001	0.5459	0.2816	0.5898	0.0007	0.8779	0.5051	0.9117	0.5907	0.7975	0.0003	0.8872	0.6089		0.9073	0.5162	0.8517	0.2031	0.9405	0.1906	0.7911	0.2035	0.0058	0.1908	0.1204	0.3212	0.605	0.4158	0.4156	0.118	0.0034	0.7591	0.99	0.0153	0.2258	0.4592	0.0028	0.7956	0.8875	0.0515	0.0992	0.3506	0.8146	0.9873	0.1725	0.0151	0.3981	0.445
GBP4	-0.15899	-0.1784	-0.08103	-0.14458	-0.18289	-0.29056	-0.28261	-0.33863	-0.09408	-0.29338	-0.3261	-0.0494	-0.17196	-0.09624	0.02955	1	0.33284	-0.05228	-0.3042	-0.29765	-0.2545	-0.12154	0.25549	-0.21457	-0.26717	-0.28121	-0.25439	-0.18863	-0.0238	-0.34119	-0.32903	-0.31668	-0.41751	-0.30193	0.03581	-0.35573	-0.26991	0.02508	0.20246	-0.14796	-0.53395	-0.25994	-0.35209	-0.14789	-0.41655	-0.21305	0.00317	-0.44269	-0.183
GBP4	0.5286	0.4788	0.7493	0.567	0.4676	0.2421	0.2558	0.1693	0.7104	0.2374	0.1866	0.8457	0.4951	0.704	0.9073		0.1771	0.8368	0.2197	0.2303	0.3081	0.6309	0.3062	0.3925	0.2838	0.2583	0.3083	0.4535	0.9253	0.1659	0.1825	0.2004	0.0847	0.2233	0.8878	0.1474	0.2787	0.9213	0.4204	0.5579	0.0225	0.2975	0.1519	0.5581	0.0855	0.396	0.9901	0.0658	0.4673
GNL1	-0.31653	-0.41306	-0.11242	0.29318	-0.07467	-0.32603	0.11611	-0.03338	0.08025	0.28363	-0.3266	-0.15191	0.06719	0.28044	-0.16372	0.33284	1	-0.31489	-0.36528	0.38593	-0.21388	0.52287	-0.21639	-0.42085	-0.16203	-0.34867	0.21454	0.06195	-0.15805	-0.10502	0.02742	-0.21066	-0.09477	-0.2252	0.11238	-0.21846	0.04662	-0.17417	0.42642	0.11218	-0.18288	0.25324	0.2491	0.16718	-0.00096	-0.15365	-0.02852	-0.1733	0.07578
GNL1	0.2006	0.0884	0.6569	0.2377	0.7684	0.1867	0.6464	0.8954	0.7516	0.254	0.1859	0.5473	0.7911	0.2597	0.5162	0.1771		0.2031	0.1361	0.1137	0.3941	0.026	0.3884	0.082	0.5207	0.1562	0.3926	0.8071	0.5311	0.6784	0.914	0.4014	0.7084	0.3689	0.6571	0.3838	0.8543	0.4894	0.0776	0.6576	0.4676	0.3106	0.3189	0.5073	0.997	0.5427	0.9106	0.4916	0.765
YWHAG	-0.11232	0.19876	0.88338	-0.37961	0.27693	0.02603	-0.15047	-0.053	-0.00246	-0.18416	0.13587	0.1801	-0.00312	-0.14019	0.04744	-0.05228	-0.31489	1	0.58603	-0.27239	0.44864	0.13928	0.52028	0.19398	0.39294	0.37176	-0.27909	-0.39203	0.02227	0.71086	0.25952	0.04717	-0.34051	0.10723	0.1055	0.05981	-0.13443	0.07905	0.14983	-0.28992	0.14457	-0.25274	-0.0081	-0.16715	-0.14883	-0.10061	0.22266	0.31012	-0.17878
YWHAG	0.6572	0.4291	<.0001	0.1202	0.2659	0.9183	0.5512	0.8345	0.9923	0.4645	0.5909	0.4745	0.9902	0.579	0.8517	0.8368	0.2031		0.0106	0.2742	0.0618	0.5815	0.0269	0.4406	0.1067	0.1287	0.2621	0.1076	0.9301	0.0009	0.2984	0.8526	0.1668	0.6719	0.6769	0.8136	0.5949	0.7552	0.5529	0.2432	0.5671	0.3116	0.9745	0.5074	0.5556	0.6912	0.3745	0.2104	0.4778
ALDOC	-0.12064	0.60855	0.49015	-0.21015	-0.13711	0.27368	-0.20044	0.0617	-0.04857	-0.03534	-0.07604	0.64443	-0.12998	0.14836	0.31492	-0.3042	-0.36528	0.58603	1	-0.08173	0.43211	0.09184	0.1961	0.29305	0.48033	0.34128	-0.23731	-0.04891	-0.15901	0.58626	0.53411	0.39691	-0.19898	-0.06537	0.04664	0.25559	0.26112	0.46263	-0.08729	-0.0913	0.44223	0.25241	0.07382	0.20178	0.28766	0.20046	0.06503	0.68904	0.27403
ALDOC	0.6335	0.0074	0.0389	0.4026	0.5875	0.2718	0.4252	0.8078	0.8482	0.8893	0.7643	0.0039	0.6072	0.5569	0.2031	0.2197	0.1361	0.0106		0.7471	0.0733	0.717	0.4355	0.2379	0.0436	0.1657	0.343	0.8472	0.5285	0.0106	0.0224	0.1029	0.4286	0.7966	0.8542	0.306	0.2953	0.0532	0.7305	0.7186	0.0661	0.3123	0.771	0.422	0.2471	0.4251	0.7977	0.0016	0.2712
ADAMTSL4	-0.11925	-0.18376	-0.16233	0.52851	0.03256	-0.13824	0.28167	0.56792	0.24455	0.62602	0.32891	-0.14451	0.43418	0.6559	-0.01894	-0.29765	0.38593	-0.27239	-0.08173	1	0.0687	-0.00505	-0.1523	-0.13081	0.04733	-0.04156	0.76359	0.14461	0.02463	0.12616	0.6348	0.1503	0.41959	0.01965	-0.31581	0.26083	0.5098	-0.00549	0.12107	0.32447	0.53983	0.46845	0.43728	0.42387	0.37234	0.47775	0.01165	0.46574	-0.15893
ADAMTSL4	0.6374	0.4655	0.5199	0.0241	0.898	0.5844	0.2575	0.0139	0.3281	0.0054	0.1826	0.5673	0.0718	0.0031	0.9405	0.2303	0.1137	0.2742	0.7471		0.7865	0.9841	0.5463	0.6049	0.852	0.8699	0.0002	0.567	0.9227	0.6179	0.0047	0.5517	0.083	0.9383	0.2017	0.2958	0.0307	0.9828	0.6322	0.189	0.0208	0.0499	0.0696	0.0796	0.1281	0.0449	0.9634	0.0514	0.5288
SORD	-0.17214	0.37099	0.43467	-0.39625	0.5024	0.11952	-0.09113	0.02017	0.40176	0.15694	0.35831	0.22673	-0.1562	0.16289	0.3233	-0.2545	-0.21388	0.44864	0.43211	0.0687	1	0.22864	0.3644	0.40856	0.49675	0.02884	-0.28044	-0.11523	0.42171	0.53144	0.35555	0.12317	0.09898	0.52012	0.16887	0.35181	0.28902	0.09698	0.31097	0.06779	0.42281	-0.03338	0.22482	-0.21394	0.34122	0.42119	0.51267	0.58605	-0.04384
SORD	0.4946	0.1296	0.0714	0.1035	0.0336	0.6367	0.7191	0.9367	0.0984	0.534	0.1443	0.3656	0.5359	0.5184	0.1906	0.3081	0.3941	0.0618	0.0733	0.7865		0.3615	0.1371	0.0923	0.036	0.9096	0.2597	0.6489	0.0813	0.0232	0.1476	0.6263	0.696	0.0269	0.5029	0.1522	0.2447	0.7018	0.2091	0.7893	0.0804	0.8954	0.3698	0.394	0.1658	0.0817	0.0296	0.0106	0.8629
SFRP4	-0.22715	-0.11232	0.27259	-0.17391	0.41449	0.03412	-0.08377	-0.10261	0.14311	0.32322	-0.44058	0.15486	-0.13978	-0.0637	-0.06718	-0.12154	0.52287	0.13928	0.09184	-0.00505	0.22864	1	-0.19747	-0.18972	0.21178	-0.01683	-0.2952	0.17817	-0.05167	0.31782	0.009	0.03933	0.06815	0.13046	0.45288	0.16739	0.02057	-0.12978	0.14919	-0.13325	-0.00482	0.2244	0.17826	-0.13268	0.20984	-0.21193	0.25921	-0.00128	0.27366
SFRP4	0.3647	0.6572	0.2738	0.4901	0.0872	0.8931	0.741	0.6854	0.571	0.1908	0.0673	0.5395	0.5801	0.8017	0.7911	0.6309	0.026	0.5815	0.717	0.9841	0.3615		0.4322	0.4508	0.3989	0.9472	0.2343	0.4794	0.8386	0.1987	0.9717	0.8769	0.7882	0.6059	0.0591	0.5067	0.9354	0.6078	0.5546	0.5981	0.9849	0.3707	0.4791	0.5997	0.4033	0.3985	0.299	0.996	0.2718
PODXL	0.00863	0.20221	0.42043	-0.15188	0.15878	-0.00629	-0.09771	-0.16352	0.13643	-0.19944	0.22824	0.22084	0.07655	0.05298	0.31462	0.25549	-0.21639	0.52028	0.1961	-0.1523	0.3644	-0.19747	1	0.17902	0.22634	0.35722	-0.35476	-0.27341	0.15799	0.18436	0.06566	-0.12074	-0.26122	0.06046	0.15713	0.08957	-0.00025	0.40063	0.19143	-0.08924	-0.05666	-0.05555	-0.16614	-0.09358	-0.10541	0.09134	0.50634	0.07574	-0.07765
PODXL	0.9729	0.421	0.0823	0.5474	0.5292	0.9802	0.6997	0.5168	0.5893	0.4275	0.3623	0.3785	0.7627	0.8346	0.2035	0.3062	0.3884	0.0269	0.4355	0.5463	0.1371	0.4322		0.4772	0.3664	0.1456	0.1486	0.2723	0.5312	0.464	0.7958	0.6332	0.2951	0.8117	0.5335	0.7238	0.9992	0.0994	0.4467	0.7247	0.8233	0.8267	0.51	0.7119	0.6772	0.7185	0.032	0.7652	0.7594
C9	0.30537	0.53765	0.0313	-0.3908	-0.07976	0.64005	0.36543	-0.08785	0.07177	-0.31305	0.30078	0.50872	-0.21757	-0.27856	0.62247	-0.21457	-0.42085	0.19398	0.29305	-0.13081	0.40856	-0.18972	0.17902	1	-0.16039	0.07299	-0.07886	0.06411	0.05466	0.03761	0.25373	0.69988	-0.05184	0.00197	0.27361	0.25219	-0.1543	0.25007	-0.22495	0.04704	0.35107	-0.19296	-0.13287	-0.2044	-0.11441	0.26457	0.31102	0.20805	0.11022
C9	0.2179	0.0214	0.9019	0.1088	0.7531	0.0042	0.1359	0.7289	0.7772	0.2059	0.2252	0.0311	0.3858	0.263	0.0058	0.3925	0.082	0.4406	0.2379	0.6049	0.0923	0.4508	0.4772		0.5249	0.7735	0.7558	0.8005	0.8294	0.8822	0.3096	0.0012	0.8381	0.9938	0.2719	0.3127	0.541	0.3169	0.3695	0.853	0.1532	0.443	0.5992	0.4159	0.6513	0.2887	0.209	0.4074	0.6633
HSP90AB1	-0.12064	-0.00489	0.47433	-0.06502	0.32132	-0.29185	-0.42181	0.15691	0.47745	0.30065	0.10986	-0.08914	-0.27638	0.40922	-0.32317	-0.26717	-0.16203	0.39294	0.48033	0.04733	0.49675	0.21178	0.22634	-0.16039	1	-0.00056	-0.2013	-0.08945	0.04273	0.6943	0.17119	-0.33378	0.04354	0.31142	-0.24924	-0.09497	0.57735	0.02186	0.00713	0.18278	0.15666	-0.03034	0.17066	0.063	0.45532	0.18092	0.03187	0.53103	0.149
HSP90AB1	0.6335	0.9846	0.0467	0.7977	0.1935	0.24	0.0812	0.5341	0.0451	0.2254	0.6643	0.725	0.2669	0.0917	0.1908	0.2838	0.5207	0.1067	0.0436	0.852	0.036	0.3989	0.3664	0.5249		0.9983	0.4231	0.7241	0.8663	0.0014	0.497	0.1758	0.8638	0.2084	0.3186	0.7078	0.0121	0.9314	0.9776	0.4679	0.5347	0.9049	0.4984	0.8039	0.0576	0.4725	0.9001	0.0234	0.5551
TMED7	-0.06453	0.33907	0.20438	-0.08046	0.07132	0.2633	-0.00717	0.18508	-0.31657	0.07043	0.10222	0.29274	0.38189	-0.12565	0.37943	-0.28121	-0.34867	0.37176	0.34128	-0.04156	0.02884	-0.01683	0.35722	0.07299	-0.00056	1	-0.11703	0.02534	-0.17417	0.10064	0.26379	0.22788	0.19976	-0.07289	0.29714	0.15088	-0.20346	0.36582	-0.33839	-0.4007	0.49789	0.49824	-0.25358	0.00055	-0.08479	-0.09084	0.15815	0.17169	0.09891
TMED7	0.7992	0.1687	0.4159	0.751	0.7785	0.2911	0.9775	0.4622	0.2006	0.7812	0.6865	0.2384	0.1178	0.6193	0.1204	0.2583	0.1562	0.1287	0.1657	0.8699	0.9096	0.9472	0.1456	0.7735	0.9983		0.6437	0.9205	0.4894	0.6911	0.2902	0.3631	0.4268	0.7738	0.2311	0.5501	0.4181	0.1355	0.1696	0.0994	0.0355	0.0353	0.3099	0.9983	0.738	0.72	0.5308	0.4957	0.6962
CIT	0.12242	-0.34889	-0.14262	0.53657	-0.25345	-0.25255	0.49265	0.69789	-0.01971	0.28259	0.46294	-0.33315	0.55555	0.35026	-0.24796	-0.25439	0.21454	-0.27909	-0.23731	0.76359	-0.28044	-0.2952	-0.35476	-0.07886	-0.2013	-0.11703	1	0.22853	-0.11172	0.05705	0.52139	0.15843	0.38224	-0.09451	-0.41118	-0.04712	0.22617	-0.22353	0.01913	0.23594	0.35834	0.07162	0.33415	0.21434	0.0175	0.3242	-0.39071	0.25871	-0.20047
CIT	0.6284	0.1559	0.5724	0.0217	0.3102	0.312	0.0378	0.0013	0.9381	0.2559	0.053	0.1767	0.0167	0.1542	0.3212	0.3083	0.3926	0.2621	0.343	0.0002	0.2597	0.2343	0.1486	0.7558	0.4231	0.6437		0.3617	0.659	0.8221	0.0265	0.5301	0.1175	0.7091	0.09	0.8527	0.3668	0.3726	0.9399	0.3459	0.1442	0.7776	0.1753	0.3931	0.9451	0.1893	0.1089	0.2999	0.4251
CTSL	0.36433	-0.01217	-0.3432	-0.02415	-0.17633	0.03975	0.05348	0.46996	-0.01088	0.16849	-0.11447	0.18015	0.12218	-0.01822	0.13077	-0.18863	0.06195	-0.39203	-0.04891	0.14461	-0.11523	0.17817	-0.27341	0.06411	-0.08945	0.02534	0.22853	1	-0.36976	-0.15153	0.25132	0.24404	0.50803	-0.06491	0.15654	0.12835	0.33327	0.20583	-0.37195	-0.15474	0.22075	0.25776	-0.27324	-0.10341	0.2918	0.44866	-0.04409	0.03768	0.38001
CTSL	0.1372	0.9618	0.1632	0.9242	0.484	0.8756	0.8331	0.0491	0.9658	0.5039	0.6511	0.4744	0.6291	0.9428	0.605	0.4535	0.8071	0.1076	0.8472	0.567	0.6489	0.4794	0.2723	0.8005	0.7241	0.9205	0.3617		0.131	0.5484	0.3144	0.3291	0.0314	0.798	0.535	0.6118	0.1765	0.4126	0.1285	0.5398	0.3787	0.3018	0.2726	0.683	0.24	0.0618	0.8621	0.882	0.1198
ITIH2	0.17706	-0.27081	0.05648	-0.12366	0.44805	-0.23591	0.37038	-0.03374	0.00942	0.04286	0.39085	-0.24833	-0.06319	0.01648	-0.20443	-0.0238	-0.15805	0.02227	-0.15901	0.02463	0.42171	-0.05167	0.15799	0.05466	0.04273	-0.17417	-0.11172	-0.36976	1	-0.00035	-0.27713	-0.15779	-0.02976	0.19026	-0.24745	0.44277	0.04051	-0.45522	0.24241	0.00605	-0.14231	-0.27317	0.25002	-0.31786	-0.01373	-0.09775	0.08992	-0.02309	-0.31472
ITIH2	0.4821	0.2771	0.8239	0.6249	0.0622	0.346	0.1303	0.8943	0.9704	0.8659	0.1088	0.3204	0.8033	0.9482	0.4158	0.9253	0.5311	0.9301	0.5285	0.9227	0.0813	0.8386	0.5312	0.8294	0.8663	0.4894	0.659	0.131		0.9989	0.2656	0.5318	0.9067	0.4495	0.3222	0.0658	0.8732	0.0577	0.3325	0.981	0.5732	0.2727	0.317	0.1987	0.9569	0.6996	0.7227	0.9275	0.2034
CILP2	-0.12487	0.07574	0.81358	-0.1539	0.2488	-0.10509	-0.0916	0.2405	0.31787	0.28577	0.21458	0.09744	-0.00071	0.32137	-0.20451	-0.34119	-0.10502	0.71086	0.58626	0.12616	0.53144	0.31782	0.18436	0.03761	0.6943	0.10064	0.05705	-0.15153	-0.00035	1	0.50254	0.00285	-0.00531	0.42562	0.06171	-0.01844	0.3417	-0.02069	0.15045	-0.01519	0.26494	-0.10339	0.36031	-0.01511	0.33769	0.23462	0.06419	0.69036	0.04423
CILP2	0.6215	0.7652	<.0001	0.542	0.3195	0.6781	0.7177	0.3364	0.1986	0.2503	0.3925	0.7005	0.9978	0.1935	0.4156	0.1659	0.6784	0.0009	0.0106	0.6179	0.0232	0.1987	0.464	0.8822	0.0014	0.6911	0.8221	0.5484	0.9989		0.0335	0.9911	0.9833	0.0782	0.8078	0.9421	0.1652	0.9351	0.5512	0.9523	0.288	0.6831	0.1419	0.9526	0.1705	0.3487	0.8002	0.0015	0.8617
PECAM1	-0.20941	0.36694	0.28736	0.15354	-0.13603	0.14798	0.11801	0.59678	0.11641	0.29881	0.30289	0.38909	0.43487	0.40346	0.38171	-0.32903	0.02742	0.25952	0.53411	0.6348	0.35555	0.009	0.06566	0.25373	0.17119	0.26379	0.52139	0.25132	-0.27713	0.50254	1	0.52853	0.32723	0.0676	0.03003	0.22118	0.35169	0.36451	0.08758	0.12621	0.79345	0.39562	0.27512	0.24607	0.27452	0.60833	0.11381	0.80446	0.06918
PECAM1	0.4043	0.1342	0.2476	0.543	0.5904	0.5579	0.641	0.0089	0.6455	0.2284	0.2218	0.1105	0.0713	0.0969	0.118	0.1825	0.914	0.2984	0.0224	0.0047	0.1476	0.9717	0.7958	0.3096	0.497	0.2902	0.0265	0.3144	0.2656	0.0335		0.0241	0.185	0.7898	0.9058	0.3778	0.1524	0.137	0.7297	0.6178	<.0001	0.1041	0.2692	0.325	0.2703	0.0074	0.6529	<.0001	0.785
OGN	0.04499	0.58351	-0.02412	-0.05976	-0.15017	0.71964	0.37686	0.18286	-0.10763	-0.17586	0.05906	0.71268	0.17979	-0.28147	0.6513	-0.31668	-0.21066	0.04717	0.39691	0.1503	0.12317	0.03933	-0.12074	0.69988	-0.33378	0.22788	0.15843	0.24404	-0.15779	0.00285	0.52853	1	0.20212	-0.14718	0.3097	0.47385	-0.21779	0.3595	-0.21448	0.06408	0.53763	0.19265	0.07191	0.04784	-0.09499	0.19044	0.24557	0.29717	0.2785
OGN	0.8593	0.011	0.9243	0.8138	0.552	0.0008	0.1232	0.4677	0.6708	0.4852	0.8159	0.0009	0.4753	0.2578	0.0034	0.2004	0.4014	0.8526	0.1029	0.5517	0.6263	0.8769	0.6332	0.0012	0.1758	0.3631	0.5301	0.3291	0.5318	0.9911	0.0241		0.4212	0.56	0.2111	0.047	0.3853	0.1429	0.3927	0.8006	0.0214	0.4438	0.7768	0.8505	0.7077	0.4491	0.326	0.2311	0.2631
CD93	-0.15008	-0.01539	-0.30649	0.0093	0.22177	0.10696	0.05777	0.69943	0.24669	0.47093	0.18366	-0.08493	0.3221	0.12169	0.07775	-0.41751	-0.09477	-0.34051	-0.19898	0.41959	0.09898	0.06815	-0.26122	-0.05184	0.04354	0.19976	0.38224	0.50803	-0.02976	-0.00531	0.32723	0.20212	1	0.4183	0.0985	0.08939	0.16345	-0.13826	-0.27238	0.20024	0.50514	0.22002	-0.05716	-0.1061	0.17302	0.41851	0.08915	0.25421	0.18684
CD93	0.5522	0.9517	0.2161	0.9708	0.3765	0.6727	0.8199	0.0012	0.3237	0.0485	0.4657	0.7376	0.1924	0.6305	0.7591	0.0847	0.7084	0.1668	0.4286	0.083	0.696	0.7882	0.2951	0.8381	0.8638	0.4268	0.1175	0.0314	0.9067	0.9833	0.185	0.4212		0.0841	0.6974	0.7243	0.5169	0.5843	0.2742	0.4256	0.0325	0.3803	0.8218	0.6752	0.4924	0.0839	0.725	0.3087	0.4579
PDGFRA	-0.23468	0.1992	0.21151	-0.20454	0.49906	0.16907	-0.25474	-0.00768	0.56706	0.33616	0.25121	-0.07731	-0.01069	0.17036	-0.00318	-0.30193	-0.2252	0.10723	-0.06537	0.01965	0.52012	0.13046	0.06046	0.00197	0.31142	-0.07289	-0.09451	-0.06491	0.19026	0.42562	0.0676	-0.14718	0.4183	1	0.35785	-0.02399	0.15832	-0.03255	0.17355	0.09493	0.07453	-0.12542	0.27824	-0.0844	0.44231	0.41997	0.40758	0.3487	0.01784
PDGFRA	0.3486	0.4281	0.3995	0.4155	0.035	0.5024	0.3077	0.9759	0.0141	0.1726	0.3146	0.7604	0.9664	0.4991	0.99	0.2233	0.3689	0.6719	0.7966	0.9383	0.0269	0.6059	0.8117	0.9938	0.2084	0.7738	0.7091	0.798	0.4495	0.0782	0.7898	0.56	0.0841		0.1448	0.9247	0.5304	0.898	0.491	0.7079	0.7688	0.62	0.2636	0.7392	0.0661	0.0827	0.0932	0.1561	0.944
AZGP1	-0.19223	0.45976	0.09496	-0.40036	0.03716	0.57133	-0.03788	-0.32738	0.04492	0.0204	-0.31532	0.55856	-0.04909	-0.23778	0.56175	0.03581	0.11238	0.1055	0.04664	-0.31581	0.16887	0.45288	0.15713	0.27361	-0.24924	0.29714	-0.41118	0.15654	-0.24745	0.06171	0.03003	0.3097	0.0985	0.35785	1	-0.0487	-0.34704	0.32735	-0.01657	-0.23014	-0.00457	0.21195	-0.14421	-0.1989	0.02908	0.0276	0.48928	-0.03262	0.39864
AZGP1	0.4448	0.0549	0.7078	0.0997	0.8836	0.0133	0.8814	0.1848	0.8595	0.936	0.2025	0.016	0.8466	0.3421	0.0153	0.8878	0.6571	0.6769	0.8542	0.2017	0.5029	0.0591	0.5335	0.2719	0.3186	0.2311	0.09	0.535	0.3222	0.8078	0.9058	0.2111	0.6974	0.1448		0.8478	0.1582	0.1848	0.948	0.3582	0.9857	0.3985	0.5681	0.4288	0.9088	0.9134	0.0393	0.8978	0.1013
CFD	0.26479	0.18675	0.00087	0.06121	0.33907	0.288	0.23191	0.04574	-0.1174	0.11679	0.11837	0.32388	0.19397	-0.05677	0.30041	-0.35573	-0.21846	0.05981	0.25559	0.26083	0.35181	0.16739	0.08957	0.25219	-0.09497	0.15088	-0.04712	0.12835	0.44277	-0.01844	0.22118	0.47385	0.08939	-0.02399	-0.0487	1	0.20028	0.18058	-0.00186	-0.06065	0.29812	0.29777	0.21785	0.0217	0.28798	0.18546	0.36398	0.15205	-0.16955
CFD	0.2883	0.4581	0.9973	0.8093	0.1687	0.2465	0.3545	0.857	0.6427	0.6444	0.6399	0.1898	0.4406	0.8229	0.2258	0.1474	0.3838	0.8136	0.306	0.2958	0.1522	0.5067	0.7238	0.3127	0.7078	0.5501	0.8527	0.6118	0.0658	0.9421	0.3778	0.047	0.7243	0.9247	0.8478		0.4255	0.4733	0.9942	0.8111	0.2295	0.2301	0.3852	0.9319	0.2465	0.4613	0.1376	0.547	0.5012
GPRC5C	0.23645	-0.11695	-0.09378	0.1259	-0.04849	-0.26059	-0.16548	0.30056	0.34355	0.64976	0.05258	-0.05246	-0.17908	0.80966	-0.18628	-0.26991	0.04662	-0.13443	0.26112	0.5098	0.28902	0.02057	-0.00025	-0.1543	0.57735	-0.20346	0.22617	0.33327	0.04051	0.3417	0.35169	-0.21779	0.16345	0.15832	-0.34704	0.20028	1	0.12611	-0.13825	0.16958	0.20237	0.32831	0.11787	0.29871	0.82799	0.66907	-0.0787	0.53237	0.00684
GPRC5C	0.3448	0.644	0.7113	0.6186	0.8485	0.2963	0.5117	0.2256	0.1628	0.0035	0.8358	0.8362	0.4771	<.0001	0.4592	0.2787	0.8543	0.5949	0.2953	0.0307	0.2447	0.9354	0.9992	0.541	0.0121	0.4181	0.3668	0.1765	0.8732	0.1652	0.1524	0.3853	0.5169	0.5304	0.1582	0.4255		0.618	0.5843	0.5011	0.4206	0.1835	0.6414	0.2286	<.0001	0.0024	0.7563	0.0229	0.9785
LAIR1	-0.09895	0.75916	0.03319	0.0994	-0.16146	0.48311	-0.33983	-0.17785	0.14802	-0.15444	-0.07712	0.71323	0.09888	0.07302	0.66214	0.02508	-0.17417	0.07905	0.46263	-0.00549	0.09698	-0.12978	0.40063	0.25007	0.02186	0.36582	-0.22353	0.20583	-0.45522	-0.02069	0.36451	0.3595	-0.13826	-0.03255	0.32735	0.18058	0.12611	1	-0.07578	-0.19837	0.27675	0.50652	-0.0333	0.48669	0.32747	0.37237	0.4866	0.32761	0.39097
LAIR1	0.6961	0.0003	0.896	0.6948	0.5221	0.0423	0.1677	0.4801	0.5578	0.5406	0.761	0.0009	0.6963	0.7734	0.0028	0.9213	0.4894	0.7552	0.0532	0.9828	0.7018	0.6078	0.0994	0.3169	0.9314	0.1355	0.3726	0.4126	0.0577	0.9351	0.137	0.1429	0.5843	0.898	0.1848	0.4733	0.618		0.7651	0.4301	0.2662	0.0319	0.8957	0.0405	0.1847	0.1281	0.0406	0.1845	0.1086
BGN	-0.44134	-0.05815	0.40402	0.32352	0.18694	-0.36054	0.03641	-0.16634	0.06316	-0.23293	0.24175	-0.15516	0.34014	0.0068	-0.0657	0.20246	0.42642	0.14983	-0.08729	0.12107	0.31097	0.14919	0.19143	-0.22495	0.00713	-0.33839	0.01913	-0.37195	0.24241	0.15045	0.08758	-0.21448	-0.27238	0.17355	-0.01657	-0.00186	-0.13825	-0.07578	1	0.25289	-0.14206	-0.14571	0.63818	-0.03096	-0.1265	-0.1188	0.16584	0.05198	-0.21351
BGN	0.0667	0.8187	0.0963	0.1903	0.4576	0.1416	0.8859	0.5095	0.8034	0.3523	0.3338	0.5387	0.1673	0.9786	0.7956	0.4204	0.0776	0.5529	0.7305	0.6322	0.2091	0.5546	0.4467	0.3695	0.9776	0.1696	0.9399	0.1285	0.3325	0.5512	0.7297	0.3927	0.2742	0.491	0.948	0.9942	0.5843	0.7651		0.3113	0.5739	0.564	0.0044	0.9029	0.6169	0.6387	0.5107	0.8377	0.3949
LAMC1	-0.15383	-0.06346	-0.1692	0.41733	-0.19826	-0.05642	0.09123	0.05211	0.12819	0.09372	0.12302	-0.15967	0.06058	0.23099	-0.03591	-0.14796	0.11218	-0.28992	-0.0913	0.32447	0.06779	-0.13325	-0.08924	0.04704	0.18278	-0.4007	0.23594	-0.15474	0.00605	-0.01519	0.12621	0.06408	0.20024	0.09493	-0.23014	-0.06065	0.16958	-0.19837	0.25289	1	0.04475	-0.09017	0.32559	-0.05972	-0.02573	0.06113	-0.17798	0.07802	-0.12732
LAMC1	0.5422	0.8025	0.5021	0.0849	0.4303	0.824	0.7188	0.8373	0.6122	0.7115	0.6267	0.5268	0.8113	0.3564	0.8875	0.5579	0.6576	0.2432	0.7186	0.189	0.7893	0.5981	0.7247	0.853	0.4679	0.0994	0.3459	0.5398	0.981	0.9523	0.6178	0.8006	0.4256	0.7079	0.3582	0.8111	0.5011	0.4301	0.3113		0.8601	0.722	0.1874	0.8139	0.9193	0.8096	0.4798	0.7583	0.6147
C7	-0.22505	0.43993	0.06686	0.03566	0.11246	0.28997	0.08671	0.56167	0.08608	0.30596	0.38518	0.27517	0.33953	0.19777	0.46563	-0.53395	-0.18288	0.14457	0.44223	0.53983	0.42281	-0.00482	-0.05666	0.35107	0.15666	0.49789	0.35834	0.22075	-0.14231	0.26494	0.79345	0.53763	0.50514	0.07453	-0.00457	0.29812	0.20237	0.27675	-0.14206	0.04475	1	0.49013	0.12412	0.17254	0.21284	0.45492	0.16789	0.68931	0.05949
C7	0.3693	0.0677	0.7921	0.8883	0.6568	0.2431	0.7323	0.0153	0.7341	0.2169	0.1145	0.2691	0.1681	0.4315	0.0515	0.0225	0.4676	0.5671	0.0661	0.0208	0.0804	0.9849	0.8233	0.1532	0.5347	0.0355	0.1442	0.3787	0.5732	0.288	<.0001	0.0214	0.0325	0.7688	0.9857	0.2295	0.4206	0.2662	0.5739	0.8601		0.0389	0.6236	0.4936	0.3965	0.0578	0.5055	0.0016	0.8146
PSAP	-0.21326	0.31061	-0.27722	0.2929	-0.13608	0.22291	-0.09978	0.09833	-0.12073	0.52226	-0.23066	0.36957	0.2508	0.43333	0.40088	-0.25994	0.25324	-0.25274	0.25241	0.46845	-0.03338	0.2244	-0.05555	-0.19296	-0.03034	0.49824	0.07162	0.25776	-0.27317	-0.10339	0.39562	0.19265	0.22002	-0.12542	0.21195	0.29777	0.32831	0.50652	-0.14571	-0.09017	0.49013	1	0.07441	0.48554	0.49411	0.22901	0.13449	0.3136	0.23033
PSAP	0.3955	0.2097	0.2654	0.2382	0.5903	0.374	0.6936	0.6979	0.6332	0.0262	0.3571	0.1312	0.3155	0.0724	0.0992	0.2975	0.3106	0.3116	0.3123	0.0499	0.8954	0.3707	0.8267	0.443	0.9049	0.0353	0.7776	0.3018	0.2727	0.6831	0.1041	0.4438	0.3803	0.62	0.3985	0.2301	0.1835	0.0319	0.564	0.722	0.0389		0.7692	0.0411	0.0371	0.3607	0.5947	0.2051	0.3578
MAN1A1	-0.19781	-0.0121	0.35744	0.62674	0.23286	-0.15441	0.26204	0.04003	0.18523	0.06425	0.4335	-0.09324	0.40852	0.18499	-0.2337	-0.35209	0.2491	-0.0081	0.07382	0.43728	0.22482	0.17826	-0.16614	-0.13287	0.17066	-0.25358	0.33415	-0.27324	0.25002	0.36031	0.27512	0.07191	-0.05716	0.27824	-0.14421	0.21785	0.11787	-0.0333	0.63818	0.32559	0.12412	0.07441	1	0.25502	0.2541	-0.01949	0.01922	0.3689	-0.02458
MAN1A1	0.4314	0.962	0.1453	0.0054	0.3524	0.5407	0.2935	0.8747	0.4618	0.8001	0.0723	0.7129	0.0923	0.4624	0.3506	0.1519	0.3189	0.9745	0.771	0.0696	0.3698	0.4791	0.51	0.5992	0.4984	0.3099	0.1753	0.2726	0.317	0.1419	0.2692	0.7768	0.8218	0.2636	0.5681	0.3852	0.6414	0.8957	0.0044	0.1874	0.6236	0.7692		0.3071	0.3089	0.9388	0.9397	0.1319	0.9229
RDX	-0.31787	0.28626	-0.17666	0.35577	-0.10725	0.23506	-0.21977	-0.00083	0.37098	0.20929	-0.15538	0.22524	-0.02376	0.47687	0.05949	-0.14789	0.16718	-0.16715	0.20178	0.42387	-0.21394	-0.13268	-0.09358	-0.2044	0.063	0.00055	0.21434	-0.10341	-0.31786	-0.01511	0.24607	0.04784	-0.1061	-0.0844	-0.1989	0.0217	0.29871	0.48669	-0.03096	-0.05972	0.17254	0.48554	0.25502	1	0.44101	0.25774	0.18894	0.35346	0.29453
RDX	0.1986	0.2495	0.4831	0.1474	0.6719	0.3478	0.3809	0.9974	0.1296	0.4046	0.5381	0.3688	0.9254	0.0454	0.8146	0.5581	0.5073	0.5074	0.422	0.0796	0.394	0.5997	0.7119	0.4159	0.8039	0.9983	0.3931	0.683	0.1987	0.9526	0.325	0.8505	0.6752	0.7392	0.4288	0.9319	0.2286	0.0405	0.9029	0.8139	0.4936	0.0411	0.3071		0.067	0.3018	0.4527	0.1502	0.2354
GAA	0.08979	0.18842	-0.08495	0.05975	0.12877	0.09695	-0.27997	0.03515	0.43214	0.66024	-0.05643	0.15986	-0.19654	0.66905	-0.00405	-0.41655	-0.00096	-0.14883	0.28766	0.37234	0.34122	0.20984	-0.10541	-0.11441	0.45532	-0.08479	0.0175	0.2918	-0.01373	0.33769	0.27452	-0.09499	0.17302	0.44231	0.02908	0.28798	0.82799	0.32747	-0.1265	-0.02573	0.21284	0.49411	0.2541	0.44101	1	0.6441	0.19059	0.54993	0.18155
GAA	0.7231	0.454	0.7375	0.8138	0.6106	0.7019	0.2605	0.8899	0.0733	0.0029	0.824	0.5263	0.4344	0.0024	0.9873	0.0855	0.997	0.5556	0.2471	0.1281	0.1658	0.4033	0.6772	0.6513	0.0576	0.738	0.9451	0.24	0.9569	0.1705	0.2703	0.7077	0.4924	0.0661	0.9088	0.2465	<.0001	0.1847	0.6169	0.9193	0.3965	0.0371	0.3089	0.067		0.0039	0.4487	0.0181	0.4709
CPVL	0.06143	0.32064	-0.15221	-0.12384	-0.05482	0.19034	-0.1194	0.39523	0.46979	0.43904	0.23115	0.24049	-0.00141	0.57251	0.33621	-0.21305	-0.15365	-0.10061	0.20046	0.47775	0.42119	-0.21193	0.09134	0.26457	0.18092	-0.09084	0.3242	0.44866	-0.09775	0.23462	0.60833	0.19044	0.41851	0.41997	0.0276	0.18546	0.66907	0.37237	-0.1188	0.06113	0.45492	0.22901	-0.01949	0.25774	0.6441	1	0.28893	0.63981	0.06847
CPVL	0.8087	0.1945	0.5465	0.6244	0.829	0.4493	0.637	0.1045	0.0492	0.0683	0.3561	0.3364	0.9956	0.013	0.1725	0.396	0.5427	0.6912	0.4251	0.0449	0.0817	0.3985	0.7185	0.2887	0.4725	0.72	0.1893	0.0618	0.6996	0.3487	0.0074	0.4491	0.0839	0.0827	0.9134	0.4613	0.0024	0.1281	0.6387	0.8096	0.0578	0.3607	0.9388	0.3018	0.0039		0.2449	0.0042	0.7872
HEXB	-0.29597	0.48919	0.15093	-0.28967	0.58761	0.53118	-0.21096	-0.22439	0.58475	0.00153	0.0113	0.44844	-0.07261	-0.08273	0.56253	0.00317	-0.02852	0.22266	0.06503	0.01165	0.51267	0.25921	0.50634	0.31102	0.03187	0.15815	-0.39071	-0.04409	0.08992	0.06419	0.11381	0.24557	0.08915	0.40758	0.48928	0.36398	-0.0787	0.4866	0.16584	-0.17798	0.16789	0.13449	0.01922	0.18894	0.19059	0.28893	1	0.15216	0.21266
HEXB	0.2331	0.0394	0.55	0.2436	0.0103	0.0233	0.4007	0.3707	0.0108	0.9952	0.9645	0.062	0.7746	0.7442	0.0151	0.9901	0.9106	0.3745	0.7977	0.9634	0.0296	0.299	0.032	0.209	0.9001	0.5308	0.1089	0.8621	0.7227	0.8002	0.6529	0.326	0.725	0.0932	0.0393	0.1376	0.7563	0.0406	0.5107	0.4798	0.5055	0.5947	0.9397	0.4527	0.4487	0.2449		0.5467	0.3969
CNTN1	-0.26862	0.46015	0.35429	-0.02181	0.03787	0.1368	-0.06068	0.44954	0.38187	0.38151	0.32247	0.37161	0.08315	0.56609	0.21211	-0.44269	-0.1733	0.31012	0.68904	0.46574	0.58605	-0.00128	0.07574	0.20805	0.53103	0.17169	0.25871	0.03768	-0.02309	0.69036	0.80446	0.29717	0.25421	0.3487	-0.03262	0.15205	0.53237	0.32761	0.05198	0.07802	0.68931	0.3136	0.3689	0.35346	0.54993	0.63981	0.15216	1	0.23406
CNTN1	0.2811	0.0547	0.1492	0.9316	0.8814	0.5883	0.811	0.0613	0.1179	0.1183	0.1919	0.1289	0.7429	0.0143	0.3981	0.0658	0.4916	0.2104	0.0016	0.0514	0.0106	0.996	0.7652	0.4074	0.0234	0.4957	0.2999	0.882	0.9275	0.0015	<.0001	0.2311	0.3087	0.1561	0.8978	0.547	0.0229	0.1845	0.8377	0.7583	0.0016	0.2051	0.1319	0.1502	0.0181	0.0042	0.5467		0.3499
PGA3	-0.17424	0.39459	-0.07895	-0.12832	-0.12987	0.35361	-0.00782	0.10817	0.31411	-0.08656	-0.28902	0.5737	-0.21587	-0.03436	0.19215	-0.183	0.07578	-0.17878	0.27403	-0.15893	-0.04384	0.27366	-0.07765	0.11022	0.149	0.09891	-0.20047	0.38001	-0.31472	0.04423	0.06918	0.2785	0.18684	0.01784	0.39864	-0.16955	0.00684	0.39097	-0.21351	-0.12732	0.05949	0.23033	-0.02458	0.29453	0.18155	0.06847	0.21266	0.23406	1
PGA3	0.4893	0.1051	0.7555	0.6118	0.6075	0.15	0.9754	0.6692	0.2043	0.7327	0.2447	0.0128	0.3896	0.8923	0.445	0.4673	0.765	0.4778	0.2712	0.5288	0.8629	0.2718	0.7594	0.6633	0.5551	0.6962	0.4251	0.1198	0.2034	0.8617	0.785	0.2631	0.4579	0.944	0.1013	0.5012	0.9785	0.1086	0.3949	0.6147	0.8146	0.3578	0.9229	0.2354	0.4709	0.7872	0.3969	0.3499
GPI	0.10559	0.03251	0.17389	0.76989	-0.03226	-0.20877	0.08232	-0.16833	-0.2034	-0.25506	0.27586	-0.0415	0.3654	-0.01594	-0.18701	-0.15547	0.04419	-0.06901	0.16992	0.16956	-0.15117	-0.10204	-0.05072	-0.18383	0.08133	-0.01924	0.12508	-0.19674	0.03935	-0.02389	0.03111	0.0044	-0.41023	-0.28465	-0.38998	0.25165	0.07263	0.2794	0.33577	0.10237	-0.00263	0.22311	0.65974	0.35825	0.12335	-0.27005	-0.18433	0.05437	-0.06414
GPI	0.6767	0.8981	0.4901	0.0002	0.8989	0.4058	0.7454	0.5043	0.4182	0.307	0.2679	0.8701	0.1359	0.9499	0.4574	0.5379	0.8618	0.7856	0.5003	0.5012	0.5493	0.687	0.8416	0.4653	0.7484	0.9396	0.6209	0.4339	0.8768	0.925	0.9025	0.9862	0.0909	0.2523	0.1096	0.3138	0.7746	0.2615	0.1731	0.6861	0.9917	0.3735	0.0029	0.1443	0.6258	0.2785	0.464	0.8303	0.8004
PRSS8	-0.03973	-0.15885	-0.01176	0.39938	0.03826	-0.21824	0.48783	0.44934	-0.08236	0.12025	0.56282	-0.26063	0.61033	0.17158	-0.05926	-0.33449	0.09193	-0.17565	-0.18921	0.56395	0.21176	-0.17769	-0.15607	-0.02601	-0.21931	-0.19348	0.62729	0.0439	0.36752	0.03983	0.39026	0.12341	0.35535	0.24018	-0.23823	0.31595	0.12006	-0.28123	0.52406	0.3454	0.28572	-0.00446	0.55706	-0.06164	0.04603	0.30619	-0.09342	0.24666	-0.3277
PRSS8	0.8756	0.529	0.9631	0.1006	0.8802	0.3843	0.04	0.0614	0.7453	0.6346	0.015	0.2962	0.0071	0.496	0.8153	0.1749	0.7168	0.4857	0.4521	0.0148	0.3989	0.4806	0.5363	0.9184	0.3819	0.4417	0.0053	0.8627	0.1335	0.8753	0.1093	0.6256	0.1479	0.3371	0.3411	0.2015	0.6351	0.2583	0.0256	0.1604	0.2504	0.986	0.0163	0.808	0.8561	0.2165	0.7124	0.3238	0.1843
GALNS	-0.11406	0.69957	-0.18351	-0.13662	-0.01734	0.69482	-0.36322	-0.28156	0.02314	0.11321	-0.43908	0.67289	-0.20431	-0.02902	0.55489	-0.28935	-0.18582	-0.02877	0.47877	-0.11087	0.03641	0.23561	-0.0865	0.18599	-0.00255	0.42825	-0.3999	0.2191	-0.39608	-0.08675	0.13037	0.41239	-0.00453	-0.02534	0.40403	0.31932	0.0745	0.68893	-0.40237	-0.29393	0.32385	0.65915	-0.15025	0.45822	0.44069	0.13774	0.36317	0.20461	0.44011
GALNS	0.6522	0.0012	0.4661	0.5888	0.9455	0.0014	0.1385	0.2577	0.9274	0.6547	0.0683	0.0022	0.4161	0.909	0.0168	0.2442	0.4604	0.9098	0.0444	0.6614	0.8859	0.3466	0.7329	0.46	0.992	0.0762	0.1001	0.3824	0.1037	0.7321	0.6061	0.089	0.9858	0.9205	0.0963	0.1965	0.7689	0.0016	0.0978	0.2365	0.1899	0.0029	0.5518	0.0558	0.0672	0.5857	0.1385	0.4154	0.0676
NHLRC3	-0.20699	-0.3096	-0.00392	-0.26399	-0.09117	-0.38088	0.11406	0.07704	-0.03163	0.23007	-0.28375	-0.03648	-0.13223	0.21263	-0.11051	0.38574	0.68788	-0.11282	-0.17299	0.02286	0.05524	0.46448	-0.11544	-0.28501	-0.0864	-0.18665	-0.02297	0.18447	0.07596	0.04014	-0.02109	-0.28678	-0.03466	-0.06737	0.28147	-0.3009	0.0486	-0.25755	0.27228	-0.29018	-0.17493	0.09437	-0.06881	-0.17604	0.00254	-0.02302	-0.08809	-0.02907	0.20602
NHLRC3	0.4099	0.2112	0.9877	0.2898	0.719	0.1189	0.6522	0.7613	0.9009	0.3584	0.2538	0.8857	0.601	0.3969	0.6624	0.1139	0.0016	0.6558	0.4924	0.9282	0.8277	0.0521	0.6483	0.2516	0.7332	0.4583	0.9279	0.4637	0.7645	0.8743	0.9338	0.2486	0.8914	0.7905	0.2578	0.225	0.8481	0.3022	0.2744	0.2428	0.4875	0.7095	0.7862	0.4847	0.992	0.9277	0.7281	0.9088	0.4121
[truncated: 4 more columns]

## Sheet: Suppl. Table 2C, Shaired
Supplementary table 2C. Pearson's correlation matrix of proteins selected frm the proteins in Table 2. Analysis of 19 proteins detected in both AD and control group are shown. (A) Control, (B) AD group. Correlation coefficients (γ) are presented in the upper row and p-values in the lower row. Color scheme for γ is gray: 0.0 to ±0.2, black: ±0.2 to ±0.4, blue: ±0.4 to ±0.7, red: ±0.7 to ±1.0. Colo…
(A) AD
	AZGP1	CFD	GPRC5C	LAIR1	BGN	LAMC1	C7	PSAP	MAN1A1	RDX	GAA	CPVL	HEXB	CNTN1	PGA3	GPI	PRSS8	GALNS	NHLRC3
AZGP1	1	-0.2728	-0.13972	-0.10211	-0.34598	-0.13374	-0.0811	-0.25022	-0.2943	-0.26576	-0.09805	-0.32778	0.01485	-0.31347	0.30221	0.36402	-0.04986	-0.16322	-0.1718
AZGP1		0.2734	0.5803	0.6868	0.1596	0.5968	0.749	0.3166	0.2358	0.2865	0.6987	0.1842	0.9534	0.2053	0.2229	0.1375	0.8442	0.5175	0.4955
CFD	-0.2728	1	-0.092	-0.26602	0.20745	-0.16462	-0.09211	0.02136	0.31423	0.15975	0.03066	-0.06644	-0.32446	-0.0605	0.13156	-0.18586	-0.09578	-0.08883	-0.23029
CFD	0.2734		0.7166	0.286	0.4088	0.5139	0.7162	0.933	0.2041	0.5266	0.9039	0.7934	0.189	0.8115	0.6028	0.4603	0.7054	0.7259	0.3579
GPRC5C	-0.13972	-0.092	1	0.7549	0.30605	0.26001	0.57646	0.92219	0.22674	0.73791	0.67911	0.21712	0.18434	0.39222	-0.12777	-0.08874	-0.00881	0.79011	0.61429
GPRC5C	0.5803	0.7166		0.0003	0.2168	0.2974	0.0123	<.0001	0.3656	0.0005	0.0019	0.3868	0.464	0.1074	0.6134	0.7262	0.9723	<.0001	0.0067
LAIR1	-0.10211	-0.26602	0.7549	1	0.48559	0.2219	0.67363	0.75577	0.20431	0.28867	0.63799	0.48238	0.07224	0.60523	0.00887	0.08592	0.15503	0.49528	0.34736
LAIR1	0.6868	0.286	0.0003		0.0411	0.3762	0.0022	0.0003	0.4161	0.2453	0.0044	0.0426	0.7758	0.0078	0.9721	0.7346	0.539	0.0366	0.1578
BGN	-0.34598	0.20745	0.30605	0.48559	1	0.00542	-0.01943	0.45545	0.69494	0.11394	0.44818	0.68765	0.01886	0.78132	0.27579	0.36558	-0.00387	0.36889	0.10108
BGN	0.1596	0.4088	0.2168	0.0411		0.983	0.939	0.0575	0.0014	0.6526	0.0621	0.0016	0.9408	0.0001	0.268	0.1357	0.9878	0.132	0.6898
LAMC1	-0.13374	-0.16462	0.26001	0.2219	0.00542	1	0.34259	0.20517	0.03702	0.4785	0.19398	0.06107	0.58974	0.14232	-0.23694	0.21704	0.82277	0.25533	0.22426
LAMC1	0.5968	0.5139	0.2974	0.3762	0.983		0.164	0.4141	0.884	0.0446	0.4405	0.8098	0.01	0.5732	0.3438	0.387	<.0001	0.3065	0.371
C7	-0.0811	-0.09211	0.57646	0.67363	-0.01943	0.34259	1	0.56562	-0.1159	0.35568	0.48766	-0.1233	-0.02538	0.04049	0.12598	-0.26198	0.31452	0.29248	0.23664
C7	0.749	0.7162	0.0123	0.0022	0.939	0.164		0.0144	0.647	0.1475	0.0401	0.6259	0.9204	0.8733	0.6184	0.2936	0.2037	0.2389	0.3444
PSAP	-0.25022	0.02136	0.92219	0.75577	0.45545	0.20517	0.56562	1	0.33143	0.6216	0.77928	0.25288	0.18692	0.455	-0.07558	-0.17186	-0.00866	0.80809	0.64044
PSAP	0.3166	0.933	<.0001	0.0003	0.0575	0.4141	0.0144		0.1791	0.0059	0.0001	0.3113	0.4577	0.0578	0.7656	0.4953	0.9728	<.0001	0.0042
MAN1A1	-0.2943	0.31423	0.22674	0.20431	0.69494	0.03702	-0.1159	0.33143	1	0.27827	0.57726	0.67168	0.00634	0.78067	0.05965	0.07117	0.05539	0.25819	0.15362
MAN1A1	0.2358	0.2041	0.3656	0.4161	0.0014	0.884	0.647	0.1791		0.2635	0.0121	0.0023	0.9801	0.0001	0.8141	0.779	0.8272	0.3009	0.5428
RDX	-0.26576	0.15975	0.73791	0.28867	0.11394	0.4785	0.35568	0.6216	0.27827	1	0.41883	0.09503	0.36365	0.20378	-0.11639	-0.04133	0.23624	0.60478	0.42303
RDX	0.2865	0.5266	0.0005	0.2453	0.6526	0.0446	0.1475	0.0059	0.2635		0.0836	0.7076	0.138	0.4173	0.6456	0.8706	0.3453	0.0078	0.0803
GAA	-0.09805	0.03066	0.67911	0.63799	0.44818	0.19398	0.48766	0.77928	0.57726	0.41883	1	0.34701	0.25358	0.54486	0.09046	-0.18517	0.14775	0.74796	0.64442
GAA	0.6987	0.9039	0.0019	0.0044	0.0621	0.4405	0.0401	0.0001	0.0121	0.0836		0.1583	0.31	0.0194	0.7211	0.462	0.5585	0.0004	0.0039
CPVL	-0.32778	-0.06644	0.21712	0.48238	0.68765	0.06107	-0.1233	0.25288	0.67168	0.09503	0.34701	1	0.14015	0.91584	-0.08018	0.27382	0.08615	0.12947	0.08992
CPVL	0.1842	0.7934	0.3868	0.0426	0.0016	0.8098	0.6259	0.3113	0.0023	0.7076	0.1583		0.5791	<.0001	0.7518	0.2715	0.7339	0.6086	0.7227
HEXB	0.01485	-0.32446	0.18434	0.07224	0.01886	0.58974	-0.02538	0.18692	0.00634	0.36365	0.25358	0.14015	1	0.06988	-0.16579	0.39135	0.58227	0.44485	0.32943
HEXB	0.9534	0.189	0.464	0.7758	0.9408	0.01	0.9204	0.4577	0.9801	0.138	0.31	0.5791		0.7829	0.5109	0.1083	0.0112	0.0643	0.1819
CNTN1	-0.31347	-0.0605	0.39222	0.60523	0.78132	0.14232	0.04049	0.455	0.78067	0.20378	0.54486	0.91584	0.06988	1	-0.04391	0.20566	0.06369	0.29918	0.23609
CNTN1	0.2053	0.8115	0.1074	0.0078	0.0001	0.5732	0.8733	0.0578	0.0001	0.4173	0.0194	<.0001	0.7829		0.8627	0.4129	0.8018	0.2278	0.3456
PGA3	0.30221	0.13156	-0.12777	0.00887	0.27579	-0.23694	0.12598	-0.07558	0.05965	-0.11639	0.09046	-0.08018	-0.16579	-0.04391	1	0.20263	-0.09151	-0.00753	-0.10217
PGA3	0.2229	0.6028	0.6134	0.9721	0.268	0.3438	0.6184	0.7656	0.8141	0.6456	0.7211	0.7518	0.5109	0.8627		0.42	0.718	0.9763	0.6866
GPI	0.36402	-0.18586	-0.08874	0.08592	0.36558	0.21704	-0.26198	-0.17186	0.07117	-0.04133	-0.18517	0.27382	0.39135	0.20566	0.20263	1	0.33233	-0.09559	-0.43336
GPI	0.1375	0.4603	0.7262	0.7346	0.1357	0.387	0.2936	0.4953	0.779	0.8706	0.462	0.2715	0.1083	0.4129	0.42		0.1778	0.7059	0.0724
PRSS8	-0.04986	-0.09578	-0.00881	0.15503	-0.00387	0.82277	0.31452	-0.00866	0.05539	0.23624	0.14775	0.08615	0.58227	0.06369	-0.09151	0.33233	1	0.016	-0.1128
PRSS8	0.8442	0.7054	0.9723	0.539	0.9878	<.0001	0.2037	0.9728	0.8272	0.3453	0.5585	0.7339	0.0112	0.8018	0.718	0.1778		0.9498	0.6559
GALNS	-0.16322	-0.08883	0.79011	0.49528	0.36889	0.25533	0.29248	0.80809	0.25819	0.60478	0.74796	0.12947	0.44485	0.29918	-0.00753	-0.09559	0.016	1	0.83613
GALNS	0.5175	0.7259	<.0001	0.0366	0.132	0.3065	0.2389	<.0001	0.3009	0.0078	0.0004	0.6086	0.0643	0.2278	0.9763	0.7059	0.9498		<.0001
NHLRC3	-0.1718	-0.23029	0.61429	0.34736	0.10108	0.22426	0.23664	0.64044	0.15362	0.42303	0.64442	0.08992	0.32943	0.23609	-0.10217	-0.43336	-0.1128	0.83613	1
NHLRC3	0.4955	0.3579	0.0067	0.1578	0.6898	0.371	0.3444	0.0042	0.5428	0.0803	0.0039	0.7227	0.1819	0.3456	0.6866	0.0724	0.6559	<.0001
(B) Control
	AZGP1	CFD	GPRC5C	LAIR1	BGN	LAMC1	C7	PSAP	MAN1A1	RDX	GAA	CPVL	HEXB	CNTN1	PGA3	GPI	PRSS8	GALNS	NHLRC3
AZGP1	1	-0.0487	-0.34704	0.32735	-0.01657	-0.23014	-0.00457	0.21195	-0.14421	-0.1989	0.02908	0.0276	0.48928	-0.03262	0.39864	-0.38998	-0.23823	0.40403	0.28147
AZGP1		0.8478	0.1582	0.1848	0.948	0.3582	0.9857	0.3985	0.5681	0.4288	0.9088	0.9134	0.0393	0.8978	0.1013	0.1096	0.3411	0.0963	0.2578
CFD	-0.0487	1	0.20028	0.18058	-0.00186	-0.06065	0.29812	0.29777	0.21785	0.0217	0.28798	0.18546	0.36398	0.15205	-0.16955	0.25165	0.31595	0.31932	-0.3009
CFD	0.8478		0.4255	0.4733	0.9942	0.8111	0.2295	0.2301	0.3852	0.9319	0.2465	0.4613	0.1376	0.547	0.5012	0.3138	0.2015	0.1965	0.225
GPRC5C	-0.34704	0.20028	1	0.12611	-0.13825	0.16958	0.20237	0.32831	0.11787	0.29871	0.82799	0.66907	-0.0787	0.53237	0.00684	0.07263	0.12006	0.0745	0.0486
GPRC5C	0.1582	0.4255		0.618	0.5843	0.5011	0.4206	0.1835	0.6414	0.2286	<.0001	0.0024	0.7563	0.0229	0.9785	0.7746	0.6351	0.7689	0.8481
LAIR1	0.32735	0.18058	0.12611	1	-0.07578	-0.19837	0.27675	0.50652	-0.0333	0.48669	0.32747	0.37237	0.4866	0.32761	0.39097	0.2794	-0.28123	0.68893	-0.25755
LAIR1	0.1848	0.4733	0.618		0.7651	0.4301	0.2662	0.0319	0.8957	0.0405	0.1847	0.1281	0.0406	0.1845	0.1086	0.2615	0.2583	0.0016	0.3022
BGN	-0.01657	-0.00186	-0.13825	-0.07578	1	0.25289	-0.14206	-0.14571	0.63818	-0.03096	-0.1265	-0.1188	0.16584	0.05198	-0.21351	0.33577	0.52406	-0.40237	0.27228
BGN	0.948	0.9942	0.5843	0.7651		0.3113	0.5739	0.564	0.0044	0.9029	0.6169	0.6387	0.5107	0.8377	0.3949	0.1731	0.0256	0.0978	0.2744
LAMC1	-0.23014	-0.06065	0.16958	-0.19837	0.25289	1	0.04475	-0.09017	0.32559	-0.05972	-0.02573	0.06113	-0.17798	0.07802	-0.12732	0.10237	0.3454	-0.29393	-0.29018
LAMC1	0.3582	0.8111	0.5011	0.4301	0.3113		0.8601	0.722	0.1874	0.8139	0.9193	0.8096	0.4798	0.7583	0.6147	0.6861	0.1604	0.2365	0.2428
C7	-0.00457	0.29812	0.20237	0.27675	-0.14206	0.04475	1	0.49013	0.12412	0.17254	0.21284	0.45492	0.16789	0.68931	0.05949	-0.00263	0.28572	0.32385	-0.17493
C7	0.9857	0.2295	0.4206	0.2662	0.5739	0.8601		0.0389	0.6236	0.4936	0.3965	0.0578	0.5055	0.0016	0.8146	0.9917	0.2504	0.1899	0.4875
PSAP	0.21195	0.29777	0.32831	0.50652	-0.14571	-0.09017	0.49013	1	0.07441	0.48554	0.49411	0.22901	0.13449	0.3136	0.23033	0.22311	-0.00446	0.65915	0.09437
PSAP	0.3985	0.2301	0.1835	0.0319	0.564	0.722	0.0389		0.7692	0.0411	0.0371	0.3607	0.5947	0.2051	0.3578	0.3735	0.986	0.0029	0.7095
MAN1A1	-0.14421	0.21785	0.11787	-0.0333	0.63818	0.32559	0.12412	0.07441	1	0.25502	0.2541	-0.01949	0.01922	0.3689	-0.02458	0.65974	0.55706	-0.15025	-0.06881
MAN1A1	0.5681	0.3852	0.6414	0.8957	0.0044	0.1874	0.6236	0.7692		0.3071	0.3089	0.9388	0.9397	0.1319	0.9229	0.0029	0.0163	0.5518	0.7862
RDX	-0.1989	0.0217	0.29871	0.48669	-0.03096	-0.05972	0.17254	0.48554	0.25502	1	0.44101	0.25774	0.18894	0.35346	0.29453	0.35825	-0.06164	0.45822	-0.17604
RDX	0.4288	0.9319	0.2286	0.0405	0.9029	0.8139	0.4936	0.0411	0.3071		0.067	0.3018	0.4527	0.1502	0.2354	0.1443	0.808	0.0558	0.4847
GAA	0.02908	0.28798	0.82799	0.32747	-0.1265	-0.02573	0.21284	0.49411	0.2541	0.44101	1	0.6441	0.19059	0.54993	0.18155	0.12335	0.04603	0.44069	0.00254
GAA	0.9088	0.2465	<.0001	0.1847	0.6169	0.9193	0.3965	0.0371	0.3089	0.067		0.0039	0.4487	0.0181	0.4709	0.6258	0.8561	0.0672	0.992
CPVL	0.0276	0.18546	0.66907	0.37237	-0.1188	0.06113	0.45492	0.22901	-0.01949	0.25774	0.6441	1	0.28893	0.63981	0.06847	-0.27005	0.30619	0.13774	-0.02302
CPVL	0.9134	0.4613	0.0024	0.1281	0.6387	0.8096	0.0578	0.3607	0.9388	0.3018	0.0039		0.2449	0.0042	0.7872	0.2785	0.2165	0.5857	0.9277
HEXB	0.48928	0.36398	-0.0787	0.4866	0.16584	-0.17798	0.16789	0.13449	0.01922	0.18894	0.19059	0.28893	1	0.15216	0.21266	-0.18433	-0.09342	0.36317	-0.08809
HEXB	0.0393	0.1376	0.7563	0.0406	0.5107	0.4798	0.5055	0.5947	0.9397	0.4527	0.4487	0.2449		0.5467	0.3969	0.464	0.7124	0.1385	0.7281
CNTN1	-0.03262	0.15205	0.53237	0.32761	0.05198	0.07802	0.68931	0.3136	0.3689	0.35346	0.54993	0.63981	0.15216	1	0.23406	0.05437	0.24666	0.20461	-0.02907
CNTN1	0.8978	0.547	0.0229	0.1845	0.8377	0.7583	0.0016	0.2051	0.1319	0.1502	0.0181	0.0042	0.5467		0.3499	0.8303	0.3238	0.4154	0.9088
PGA3	0.39864	-0.16955	0.00684	0.39097	-0.21351	-0.12732	0.05949	0.23033	-0.02458	0.29453	0.18155	0.06847	0.21266	0.23406	1	-0.06414	-0.3277	0.44011	0.20602
PGA3	0.1013	0.5012	0.9785	0.1086	0.3949	0.6147	0.8146	0.3578	0.9229	0.2354	0.4709	0.7872	0.3969	0.3499		0.8004	0.1843	0.0676	0.4121
GPI	-0.38998	0.25165	0.07263	0.2794	0.33577	0.10237	-0.00263	0.22311	0.65974	0.35825	0.12335	-0.27005	-0.18433	0.05437	-0.06414	1	0.1439	0.12466	-0.32822
GPI	0.1096	0.3138	0.7746	0.2615	0.1731	0.6861	0.9917	0.3735	0.0029	0.1443	0.6258	0.2785	0.464	0.8303	0.8004		0.5689	0.6221	0.1836
PRSS8	-0.23823	0.31595	0.12006	-0.28123	0.52406	0.3454	0.28572	-0.00446	0.55706	-0.06164	0.04603	0.30619	-0.09342	0.24666	-0.3277	0.1439	1	-0.44005	0.01951
PRSS8	0.3411	0.2015	0.6351	0.2583	0.0256	0.1604	0.2504	0.986	0.0163	0.808	0.8561	0.2165	0.7124	0.3238	0.1843	0.5689		0.0676	0.9387
GALNS	0.40403	0.31932	0.0745	0.68893	-0.40237	-0.29393	0.32385	0.65915	-0.15025	0.45822	0.44069	0.13774	0.36317	0.20461	0.44011	0.12466	-0.44005	1	-0.2321
GALNS	0.0963	0.1965	0.7689	0.0016	0.0978	0.2365	0.1899	0.0029	0.5518	0.0558	0.0672	0.5857	0.1385	0.4154	0.0676	0.6221	0.0676		0.354
NHLRC3	0.28147	-0.3009	0.0486	-0.25755	0.27228	-0.29018	-0.17493	0.09437	-0.06881	-0.17604	0.00254	-0.02302	-0.08809	-0.02907	0.20602	-0.32822	0.01951	-0.2321	1
NHLRC3	0.2578	0.225	0.8481	0.3022	0.2744	0.2428	0.4875	0.7095	0.7862	0.4847	0.992	0.9277	0.7281	0.9088	0.4121	0.1836	0.9387	0.354

## Sheet: Supple. Table 2D
Supplementary table 2D. Summary tables of correlations significant in both AD and control group. Bold measures are ccorrelations remained significant after FDR correction.
	GAA		CNTN1	GAA
GPRC5C	AD	Cont	AD	Cont
γ	0.67911	0.48928	0.54486	0.54993
p	0.0019	0.0393	0.0194	0.0181
	PSAP		GALNS
LAIR1	AD	Cont	AD	Cont
γ	0.75577	0.50652	0.49528	0.68893
p	0.0003	0.0319	0.0366	0.0016
	MAN1A1
BGN	AD	Cont
γ	0.69494	0.63818
p	0.0014	0.0044
	PSAP
C7	AD	Cont
γ	0.56562	0.49013
p	0.0144	0.0389
	RDX	GAA	GAA	GAA	GALNS		LAIR1		C7
PSAP	AD	Cont	AD	Cont	AD	Cont	AD	Cont	AD	Cont
γ	0.6216	0.48554	0.77928	0.49411	0.80809	0.65915	0.75577	0.50652	0.56562	0.49013
p	0.0059	0.0411	0.0001	0.0371	<.0001	0.0029	0.0003	0.0319	0.0144	0.0389
	BGN
MAN1A1	AD	Cont
γ	0.69494	0.63818
p	0.0014	0.0044
	PSAP
RDX	AD	Cont
γ	0.6216	0.48554
p	0.0059	0.0411
	GPRC5C		PSAP	GAA	CNTN1	GAA
GAA	AD	Cont	AD	Cont	AD	Cont
γ	0.67911	0.48928	0.77928	0.49411	0.54486	0.54993
p	0.0019	0.0393	0.0001	0.0371	0.0194	0.0181
	CNTN1	GAA
CPVL	AD	Cont
γ	0.91584	0.63981
p	<.0001	0.0042
	GAA	GAA	CPVL	GAA
CNTN1	AD	Cont	AD	Cont
γ	0.54486	0.54993	0.91584	0.63981
p	0.0194	0.0181	<.0001	0.0042
	LAIR1		PSAP
GALNS	AD	Cont	AD	Cont
γ	0.49528	0.68893	0.75577	0.50652
p	0.0366	0.0016	0.0003	0.0319
