# Supplementary material
Source: publisher figshare collection journal article supplement (https://karger.figshare.com/articles/dataset/_/7694615)

**Supplementary Figure 1.** Comparison of GO-based classification of urinary proteins in AD and control groups. Top 10 represented GO annotations for the categories of (A) cellular component, (B) biological process, and (C) molecular function.

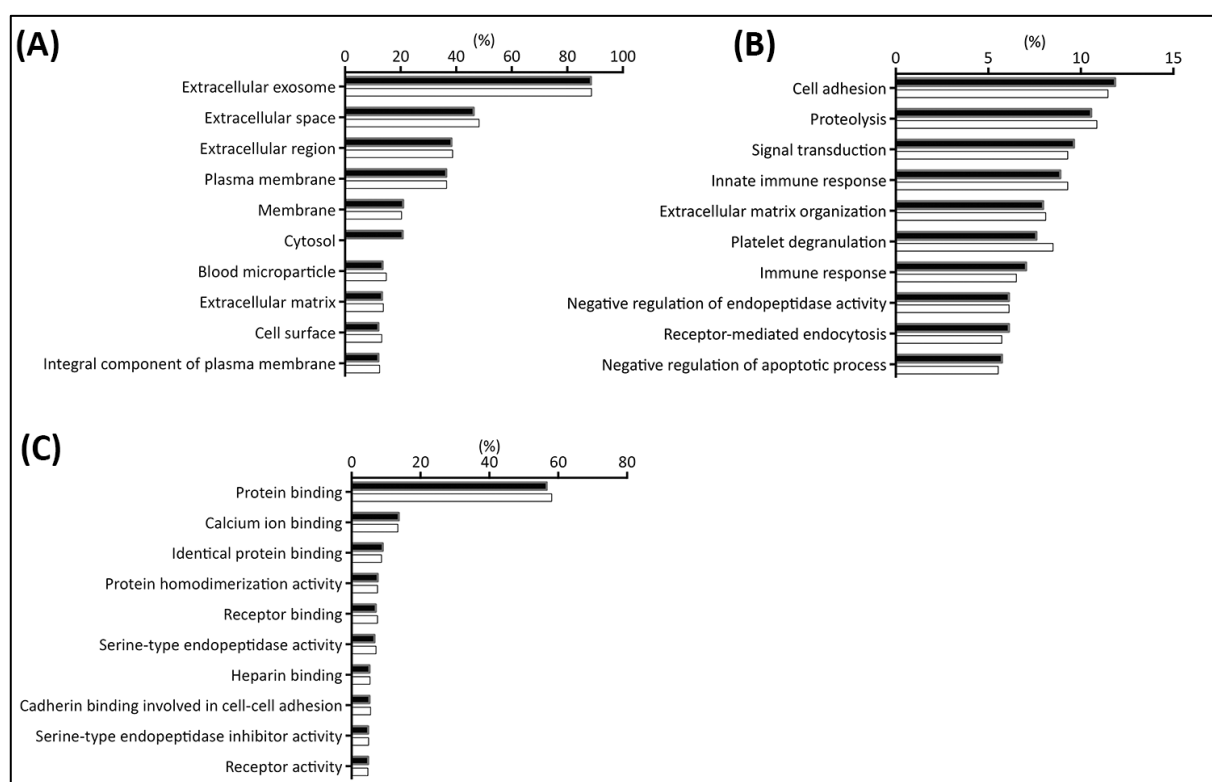

**Supplementary Figure 2.** Representative maps of the KEGG pathway included in the enriched clusters shown in Table 3. Pathway maps of (A) lysosome, (B) complement and coagulation cascades, and (C) carbon metabolism. Red objects represent differentially expressed proteins in the urinary proteome. Green objects represent human proteins in the KEGG database.

(A)

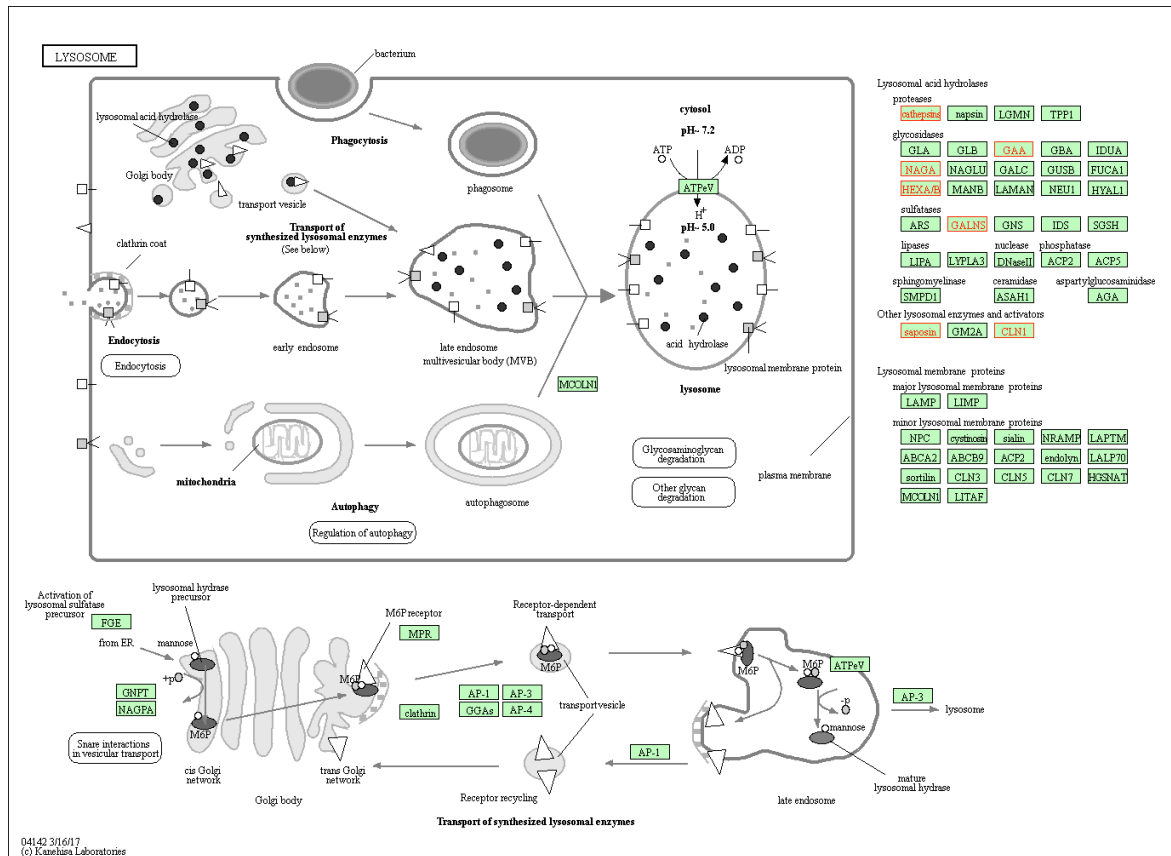

[illegible]

(C)

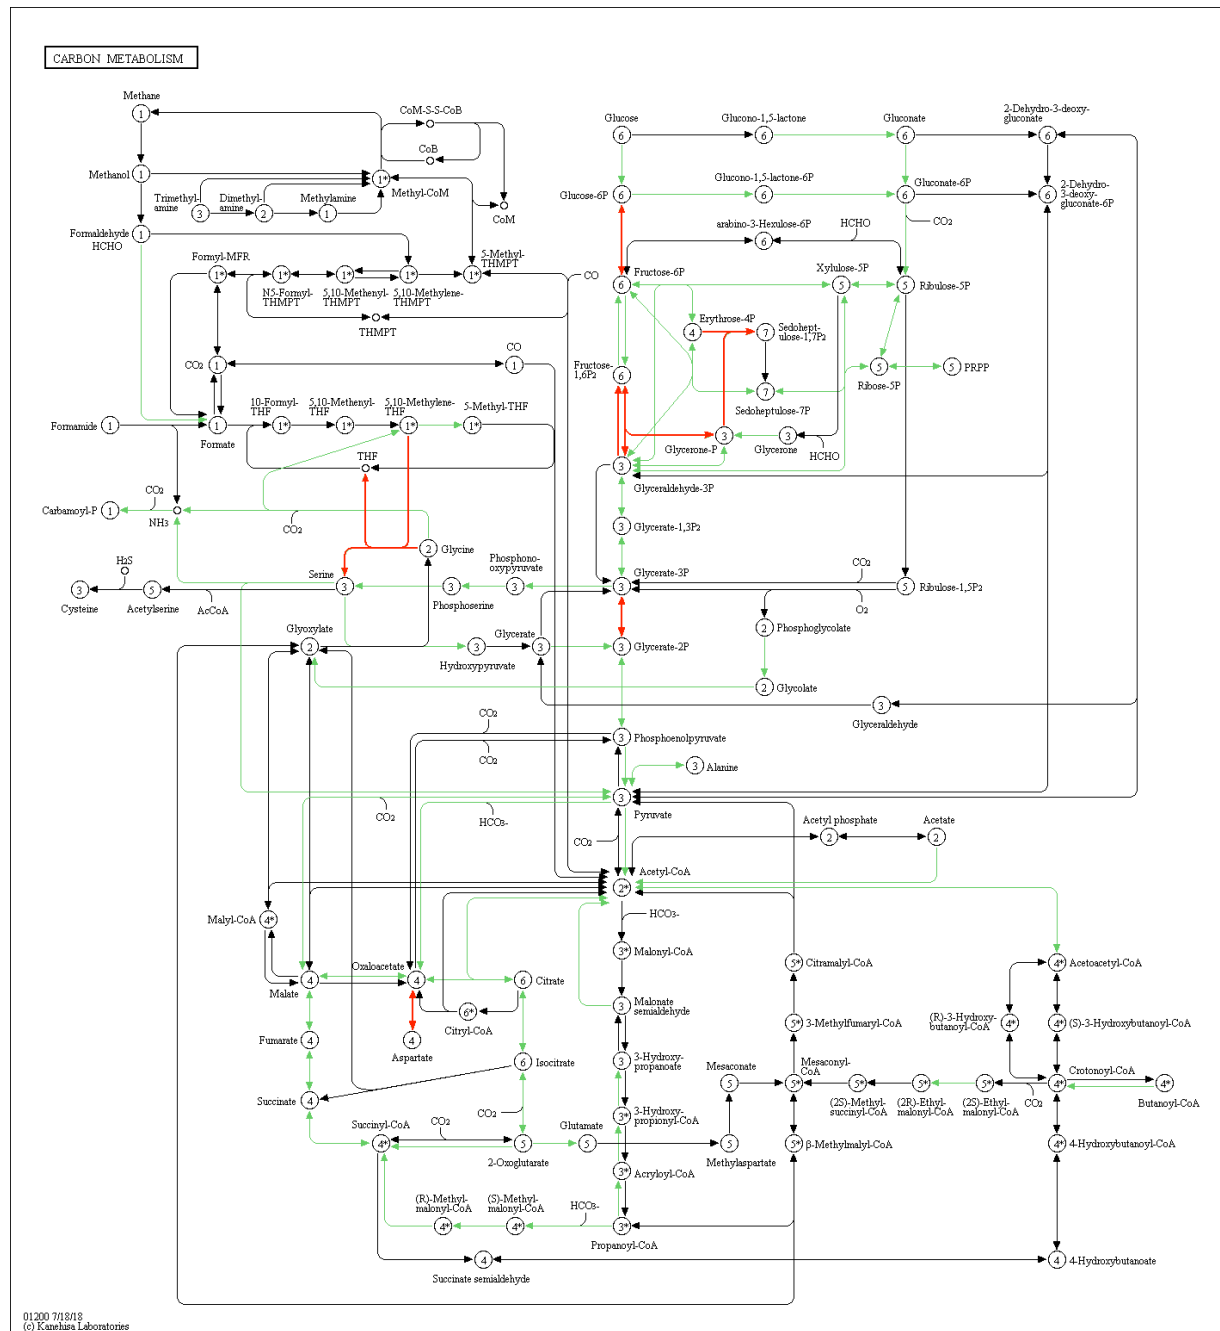

Supplement: Supplementary file 1 [file 1 › DEE496100_Supplementary_Material_3.pdf]
